# Supplementary material for: A multifunctional zeolite film enables stable high-voltage operation of a LiCoO2 cathode
Source: Royal Society of Chemistry journal article supplement (doi:10.1039/d4ee04370g), 2024-11-13
Supplement: d4ee04370g1.pdf [file d4ee04370g1.pdf]

## Supporting information

### **Multifunctional zeolite film enables stable high-voltage operation of LiCoO<sub>2</sub> cathode**

Zezhou Lin<sup>1,2#</sup>, Yiran Ying<sup>1#</sup>, Zhihang Xu<sup>1</sup>, Gao Chen<sup>1</sup>, Xi Gong<sup>1</sup>, Zehua Wang<sup>2</sup>, Daqin Guan<sup>2</sup>, Leqi Zhao<sup>2</sup>, Mingyang Yang<sup>3</sup>, Ke Fan<sup>1</sup>, Tiancheng Liu<sup>1</sup>, Hao Li<sup>1</sup>, Honglei Zhang<sup>1</sup>, Huangxu Li<sup>1</sup>, Xi Zhang<sup>4</sup>, Ye Zhu<sup>1</sup>, Zhouguang Lu<sup>3</sup>, Zongping Shao<sup>2\*</sup>, Peiyu Hou<sup>5\*</sup> and Haitao Huang<sup>1\*</sup>

<sup>1</sup> Department of Applied Physics, The Hong Kong Polytechnic University, Hong Kong 999077, China;

<sup>2</sup> WA School of Mines: Minerals, Energy and Chemical Engineering, Curtin University, Bentley, WA 6102, Australia;

<sup>3</sup> Department of Materials Science and Engineering, Shenzhen Key Laboratory of Interfacial Science and Engineering of Materials, Southern University of Science and Technology, Shenzhen 518055, China;

<sup>4</sup> Institute of Nanosurface Science and Engineering, Guangdong Provincial Key Laboratory of Micro/Nano Optomechatronics Engineering, Shenzhen University, Shenzhen 518060, China;

<sup>5</sup> School of Physics and Technology, University of Jinan, Jinan, Shandong 250022, China;

## **Experimental Section**

### **Material**

The purchased lithium cobalt oxide ( $\text{LiCoO}_2$ , 98%, International laboratory USA), Pseudo-bohemite ( $\text{AlOOH}$ ), Phosphoric acid ( $\text{H}_3\text{PO}_4$ , 85%, International laboratory USA), and Triethylamine (TEA, 99%, International laboratory USA) were directly used without purification.

### **Material synthesis**

LCO@A and LCO@Z were prepared by hydrothermal method. For LCO@A, pristine LCO was mixed with pseudo-bohemite and phosphoric acid in deionized water. For LCO@Z, pristine LCO was mixed with pseudo-bohemite, phosphoric acid, and triethylamine in deionized water. Both LCO@A and LCO@Z were processed under hydrothermal condition at  $155^\circ\text{C}$  for 1 h and the collected powders were annealed at  $550^\circ\text{C}$  for 2 h.

### **Materials Characterization**

The morphology and phase of cathodes were investigated by scanning electron microscope (SEM, MAIA3) and X-ray diffraction (XRD, Rigaku SmartLab). Cross-sectional samples were prepared by an ion Milling System (IM4000plus) and the cross-sectional images were observed using FE-SEM (Regulus8100). The microstructure of LCO@Z was studied by Transmission Electron Microscope (TEM, JEOL JEM-2100F). The Co- $L_3$ -edge X-ray absorption spectroscopy (XAS) data of cathodes were collected at the TLS 16A beamline, NSRRC, Taiwan. The chemical composition of the cycled cathode was investigated using a time-of-flight secondary ion mass spectroscopy (TOF-SIMS) equipment (IONTOF M6,

Germany). A dual beam depth profiling method was used, combining a 30 keV Bi<sup>++</sup> primary ion source that delivered 0.2 pA of target current over an area of 100 × 100 μm<sup>2</sup> for analysis, with a 1 keV Cs<sup>+</sup> sputter beam that delivered ≈90 nA of target current over an area of 300 × 300 μm<sup>2</sup> to create a sputtered crater. The surface components analysis was studied by X-Ray Photoelectron Spectroscopy (XPS, Thermo Fisher Scientific Nexsa). The specific surface area of powders was determined by Brunauer, Emmett, and Teller method (BET, ASAP 2020). *In-situ* XRD patterns were obtained using a specially designed cell with a beryllium (Be) window and at a scan range from 10° to 80°, scan rate = 10° min<sup>-1</sup>. Elemental ratios in the samples were determined using inductively coupled plasma optical emission spectroscopy (ICP-OES, Agilent 7700). Electrode conductivity of electrodes was conducted using automatic four-point probe powder resistivity instrument (ST2742B).

### **Electrochemical Measurement**

To fabricate the electrodes, a slurry was prepared by dissolving 90% active material particles (LCO, LCO@A, and LCO@Z), 5 wt% super P, and 5 wt% polyvinylidene fluoride (PVdF) in an appropriate amount of N-methyl-1,2-pyrrolidone (NMP). The mass loading of active oxide in the slurry was set to ~4 and >10 mg cm<sup>-2</sup> in half cells. The electrodes were prepared by punching the slurry onto a substrate with a diameter of 12 mm under a compression pressure of 2 MPa. In coin-type half cells, lithium metal was used as the anode. The electrolyte used in the half cells consisted of 1 M LiPF<sub>6</sub> dissolved in a mixture of ethylene carbonate (EC) and dimethyl carbonate (DMC) in a volume ratio of 1:1. The electrochemical tests were conducted at room temperature (25°C) and high temperature (60°C) using a LAND instrument (CT-2001 A). Galvanostatic intermittent titration technique (GITT) measurements were performed on

the half cells within the voltage range of 3.0-4.6 V (vs. Li/Li<sup>+</sup>). A titration current of 0.3C (1C = 200 mA·g<sup>-1</sup>) was applied for 10 minutes, followed by a relaxation time of 1 hour to allow the system to reach the quasi-equilibrium potential. Cyclic voltammetry (CV) and electrochemical impedance spectroscopy (EIS) were conducted using a Solartron 1470E instrument (AMETEK, USA). The frequency range for EIS measurements was 10<sup>-2</sup> to 10<sup>6</sup> Hz. Differential Electrochemical Mass Spectrometer (DEMS, QAS100 Li) were used for detecting the gas generation during charging and discharging of the anode material in a Swagelok-type cell, and the carrier gas was Argon with a flow rate of 1 mL min<sup>-1</sup>.

### **Computational Methods**

All spin-polarized density functional theory (DFT) calculations were performed by using the projector-augmented wave method in VASP code<sup>1,2</sup>. Perdew-Burke-Ernzerhof (PBE) scheme of generalized gradient approximation was applied as the exchange-correlation functional<sup>3</sup>. The van der Waals corrections were considered by Grimme's DFT-D3 method<sup>4</sup>. Kinetic energy cutoff was set as 420 eV, and K-points meshes with density higher than  $0.035 \times 2\pi \text{ \AA}^{-1}$  were used for Brillouin zone sampling. All structures were relaxed until energy and force convergence criteria of 10<sup>-5</sup> eV and 0.02 eV Å<sup>-1</sup> were reached, respectively. Hubbard U correction term of 3.32 eV was applied on strongly correlated cobalt atoms<sup>5</sup>. The adsorption energy  $\Delta E$  was calculated as  $\Delta E = E_{\text{surface-ad}} - E_{\text{surface}} - E_{\text{ad}}$ , where  $E_{\text{surface-ad}}$ ,  $E_{\text{surface}}$ , and  $E_{\text{ad}}$  represent DFT-calculated energies of surface with adsorption, clean surface, and adsorbate, respectively. Vacuum layers with a thickness of at least 15 Å were added to the slab structures to prevent spurious interactions. The climbing-image nudged elastic band (CI-NEB) method was used for calculating the diffusion barriers<sup>6</sup>.

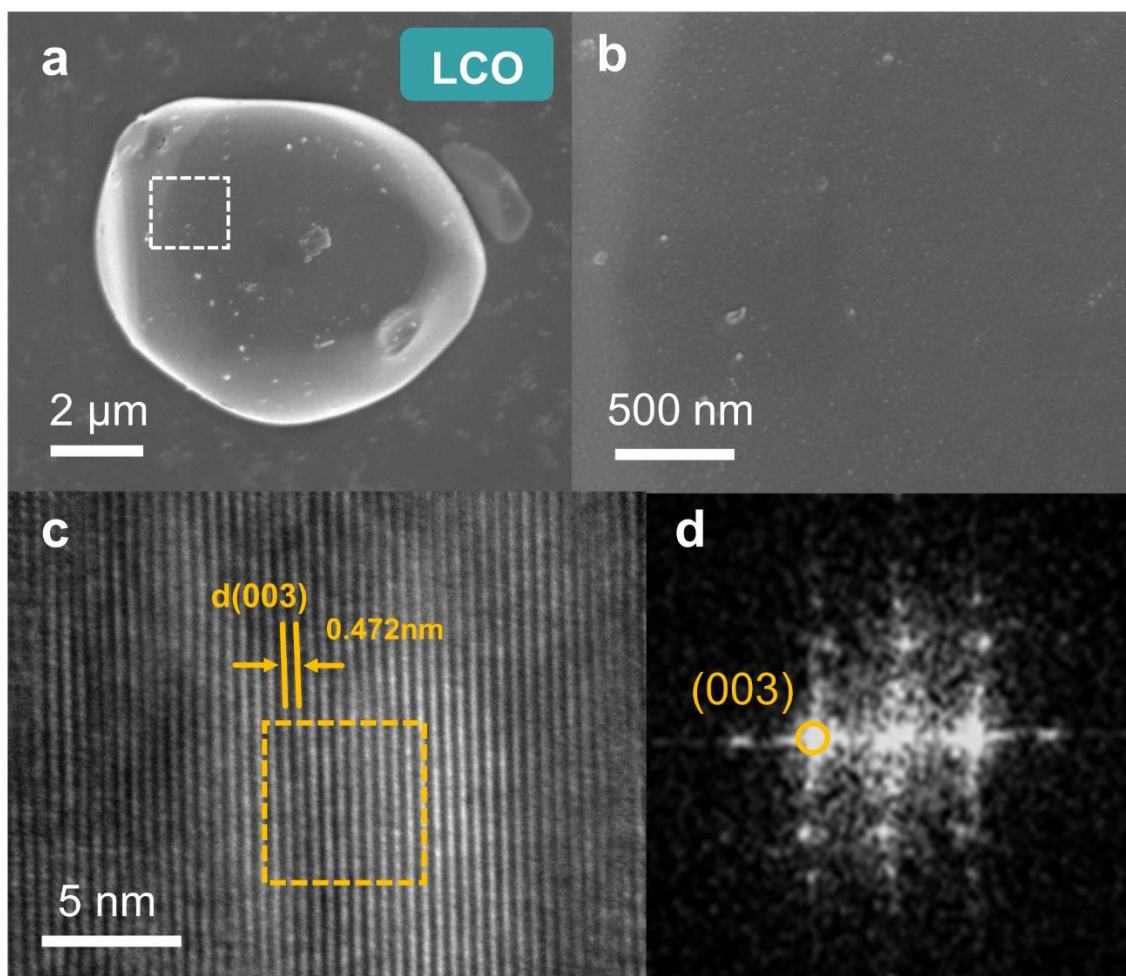

**Fig. S1** **a** SEM image of pristine LCO, and **b** magnified area of the white rectangle in **a**. **c** HRTEM image of pristine LCO and **d** FFT pattern of the orange rectangle in **c**.

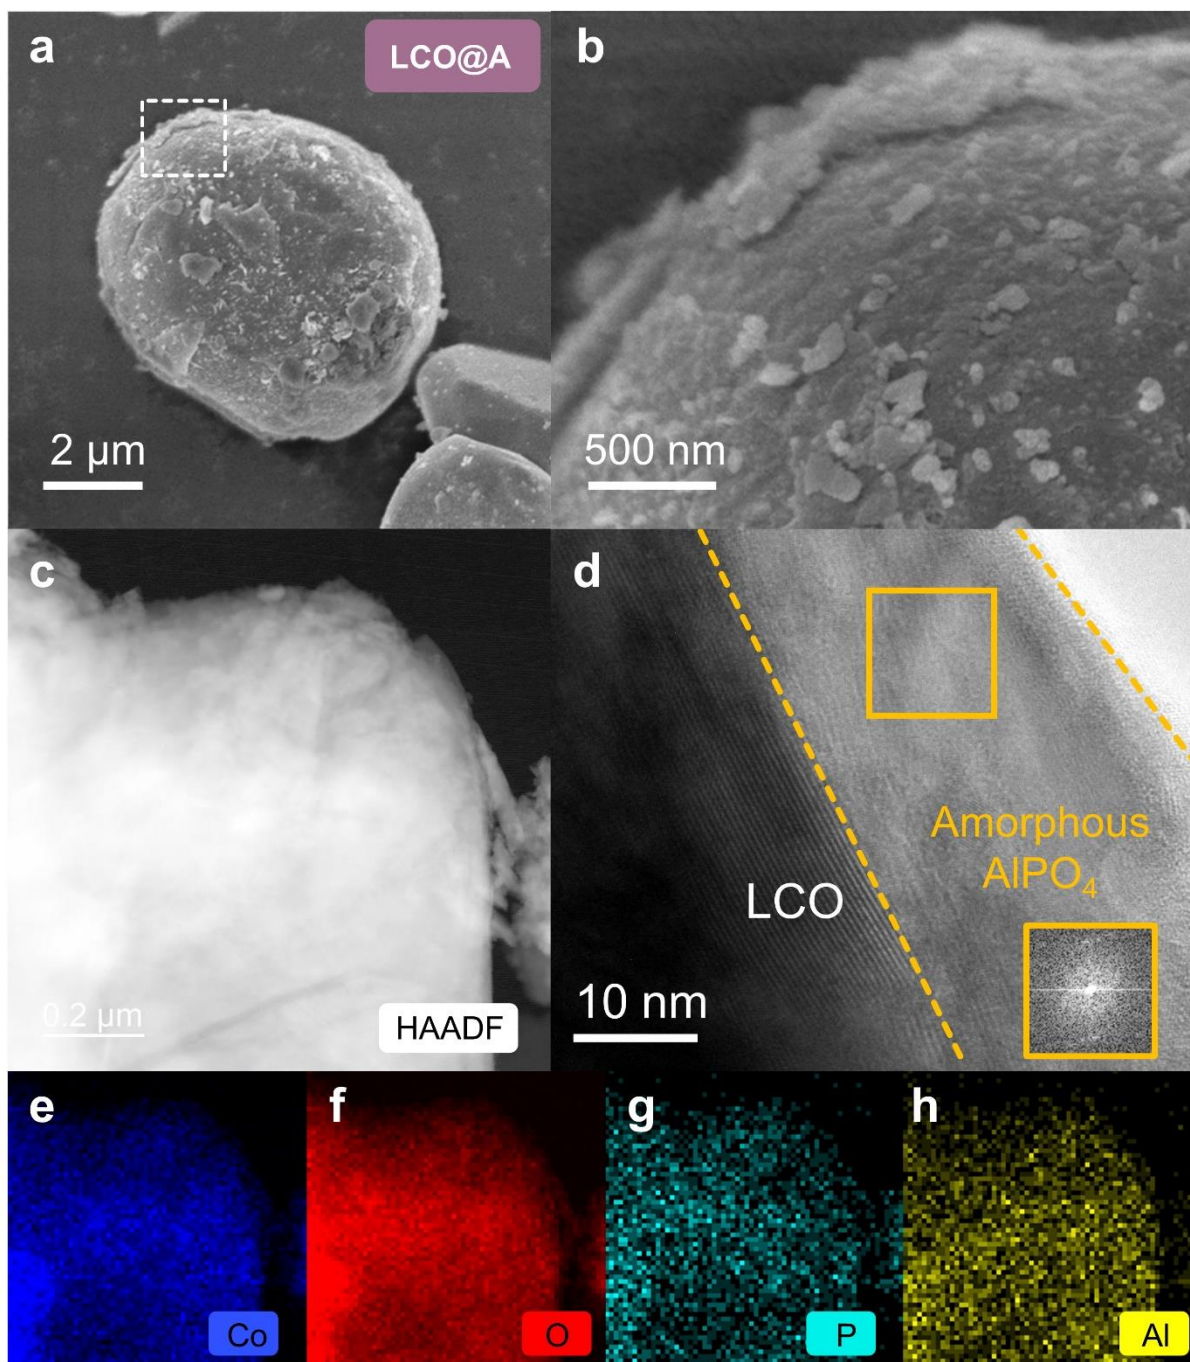

**Fig. S2** **a** SEM image of LCO@A, and **b** magnified area of the white rectangle in **a**. **c** HAADF and **d** HRTEM images of LCO@A and elemental distribution of **e** Co, **f** O, **g** P and **h** Al.

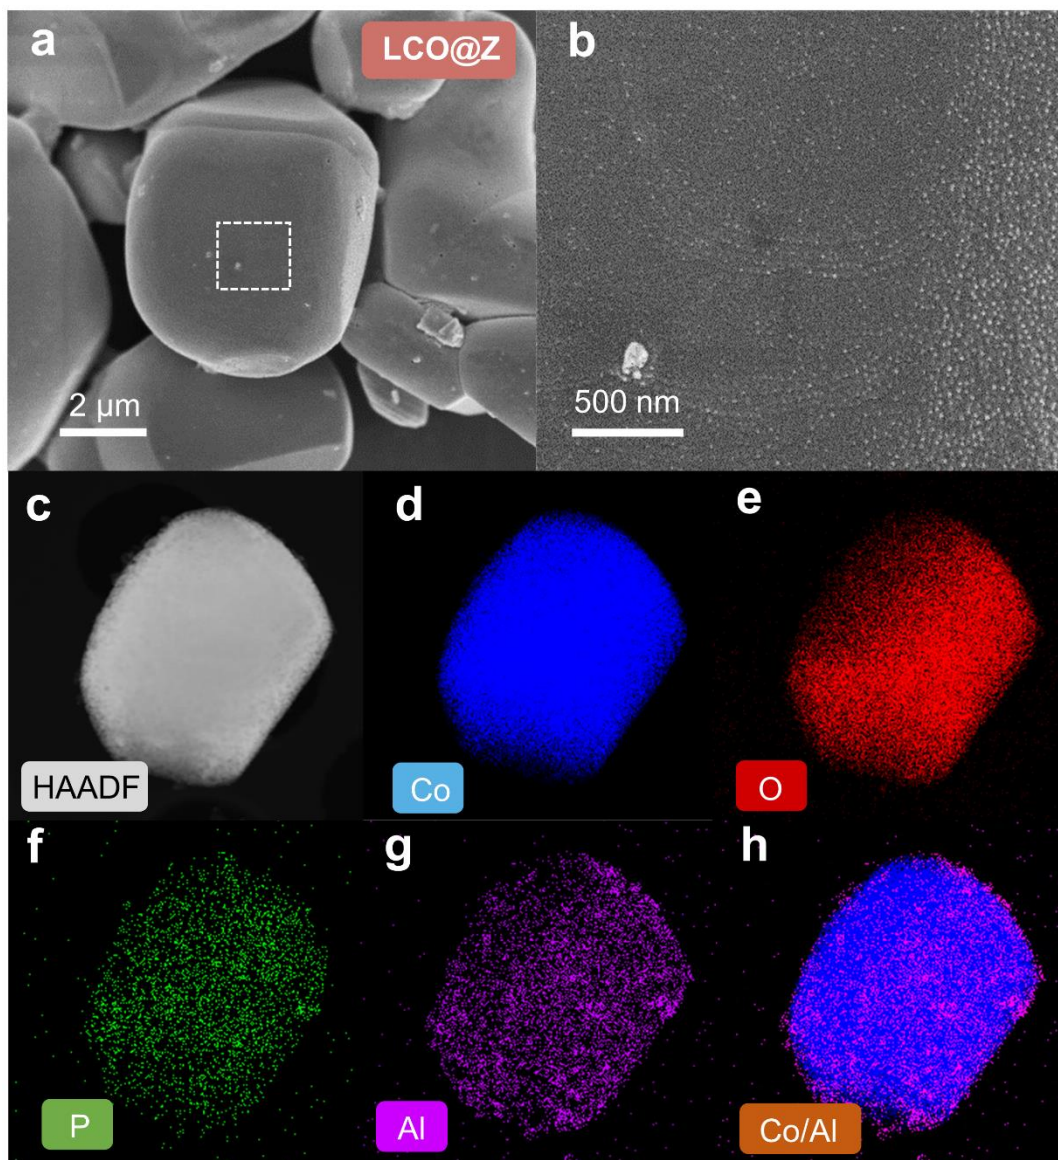

**Fig. S3** **a** SEM image of LCO@Z, and **b** magnified area of the white rectangle in **a**. **c** HAADF image of LCO@Z and elemental distribution of **d** Co, **e** O, **f** P, **g** Al and **h** Co/Al mixed.

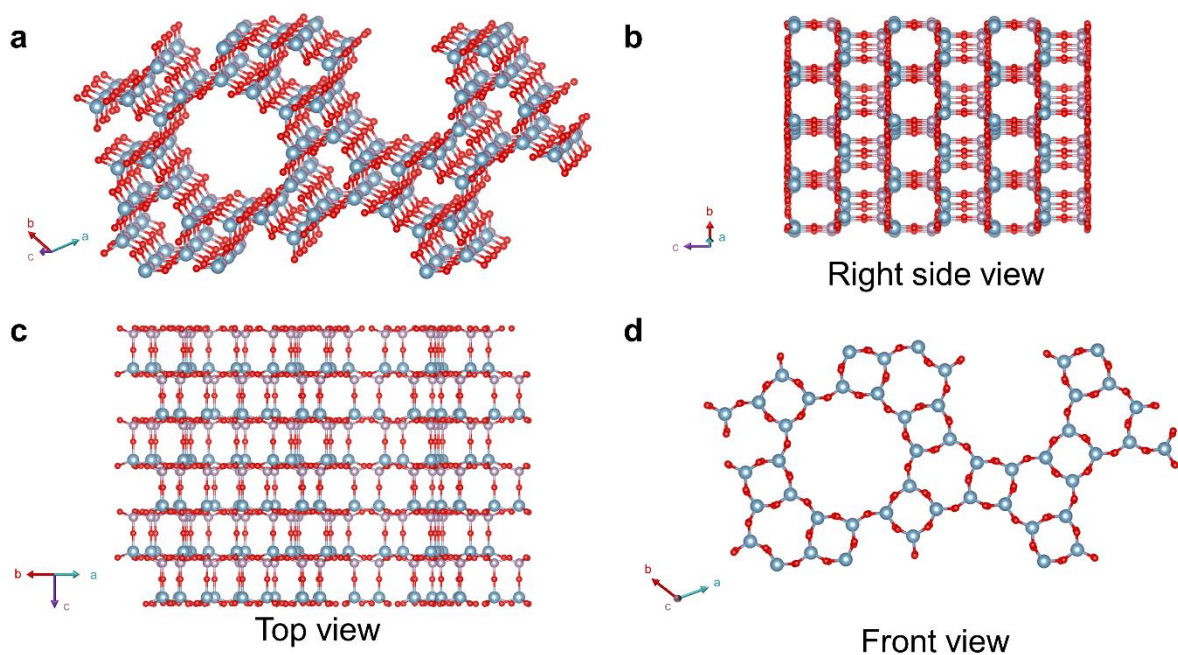

**Fig. S4** Three view of the atomic structure of the (210) slab of  $\text{AlPO}_4\text{-5}$  zeolite.

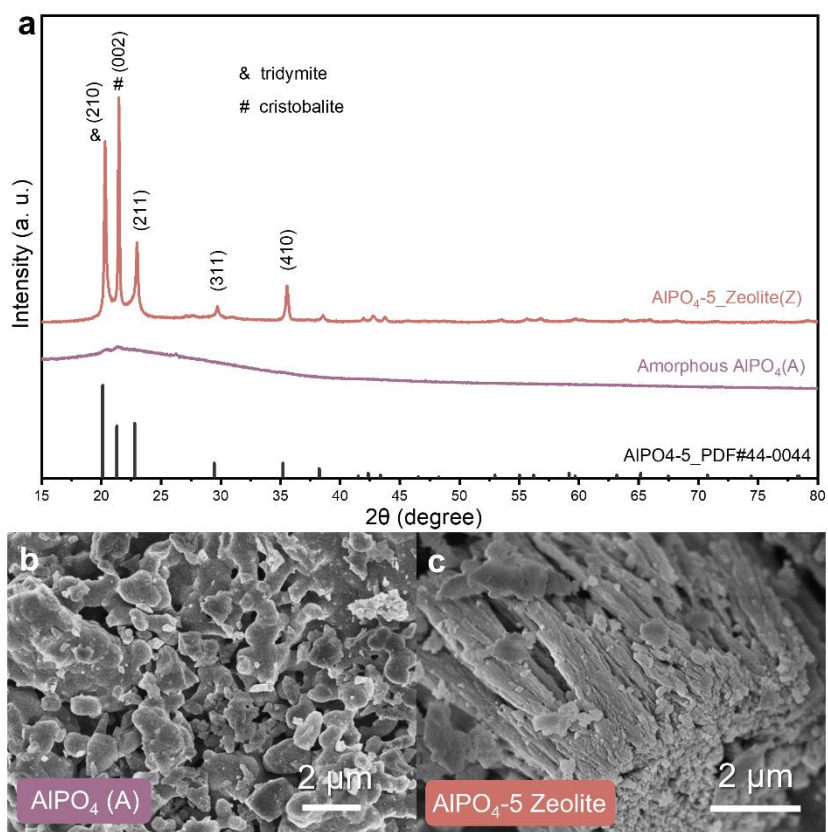

**Fig. S5 a** XRD patterns of  $\text{AlPO}_4\text{-5}$  zeolite and amorphous  $\text{AlPO}_4$ . SEM image of **b** amorphous  $\text{AlPO}_4$  and **c**  $\text{AlPO}_4\text{-5}$  zeolite.



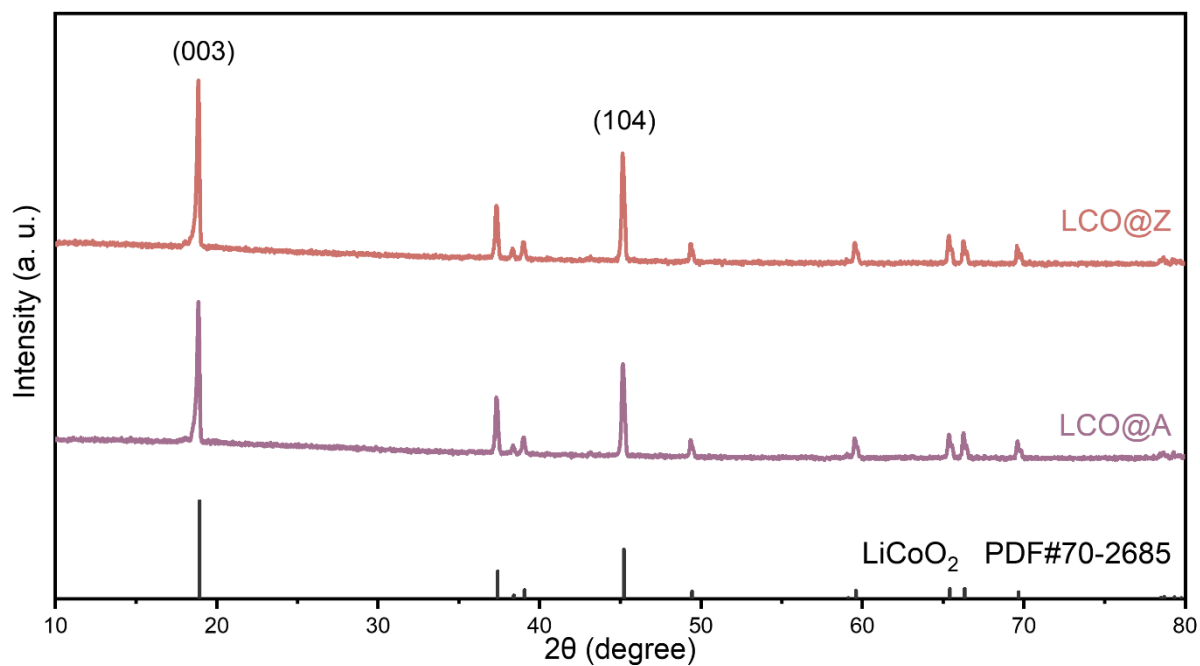

**Fig. S6** XRD patterns of as-prepared LCO@A and LCO@Z samples.

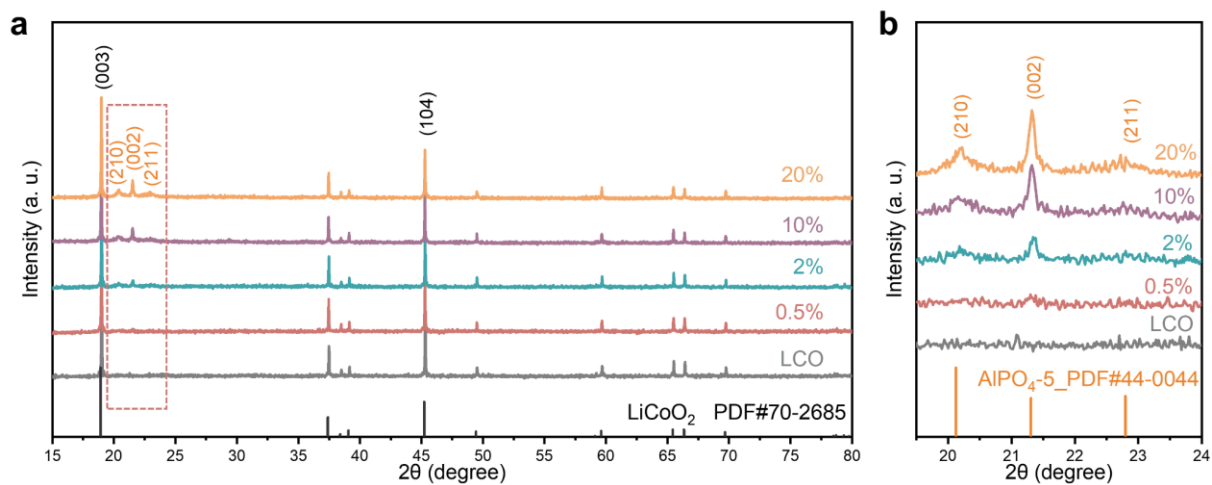

**Fig. S7** XRD patterns of LCO and LCO@Z samples, with the concentration of the precursor of  $\text{AlPO}_4\text{-5}$  in LCO@Z varying from 0.5% to 20%.

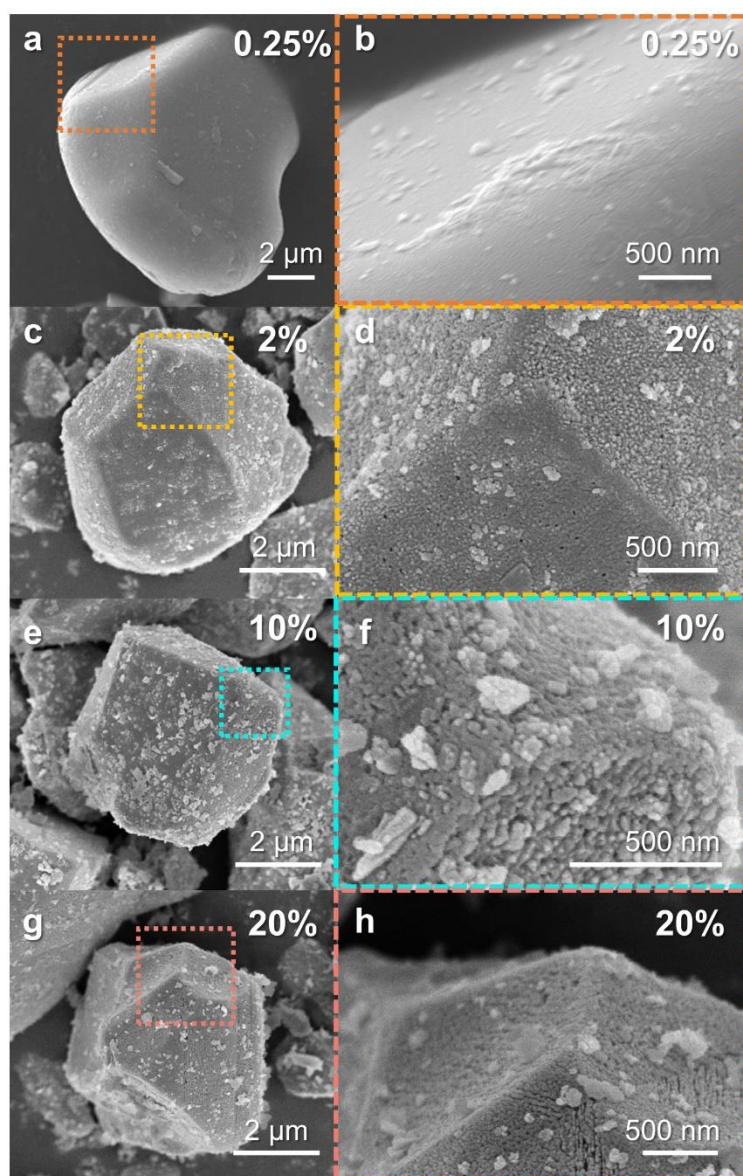

**Fig. S8** SEM images of LCO@Z samples. The concentration of AlPO<sub>4-5</sub> precursor varies from 0.25% to 20%.

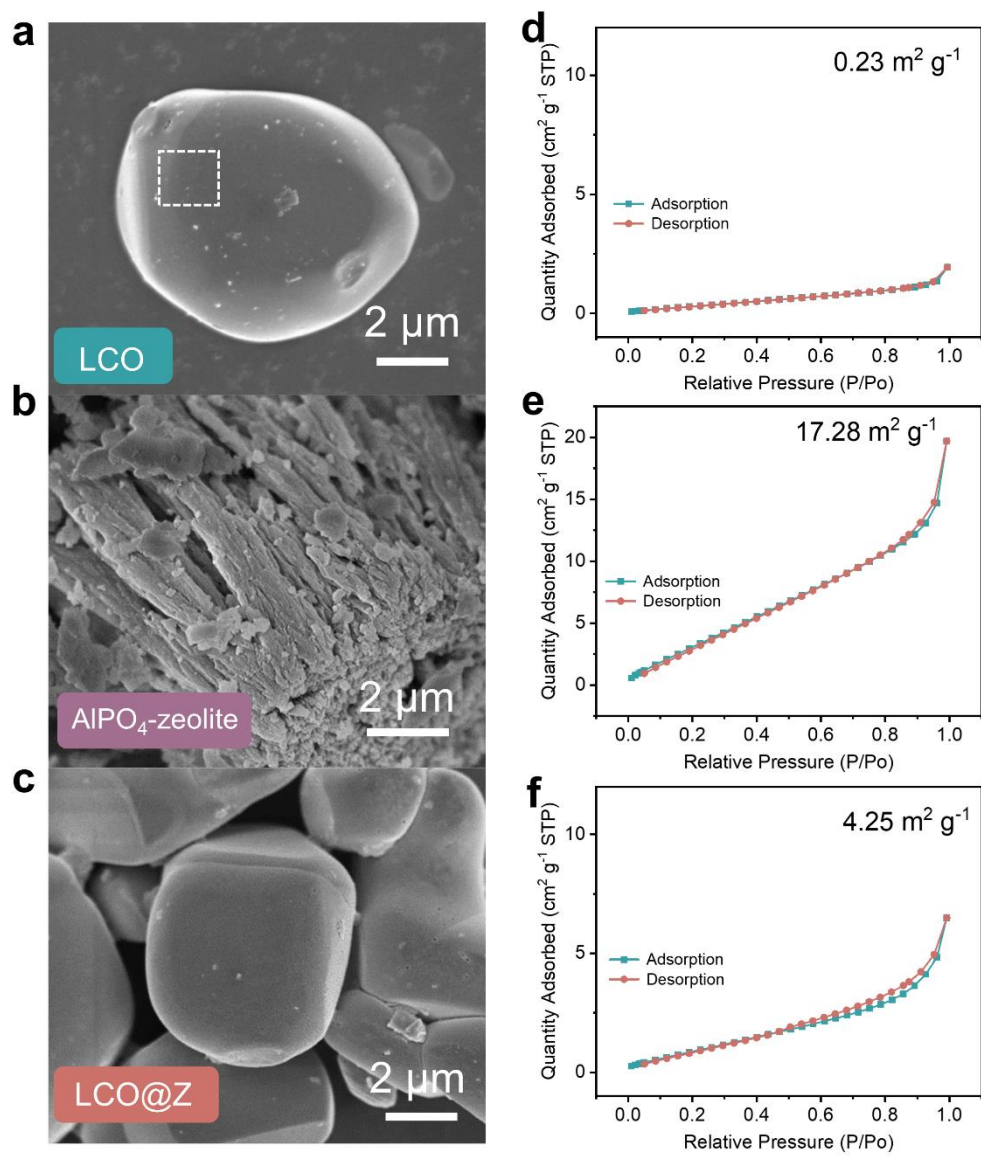

**Fig. S9** SEM images of **a** LCO, **b** AlPO<sub>4</sub>-5 zeolite and **c** LCO@Z. The corresponding Brunauer-Emmett-Teller (BET) result of **d** LCO, **e** AlPO<sub>4</sub>-5 zeolite and **f** LCO@Z.

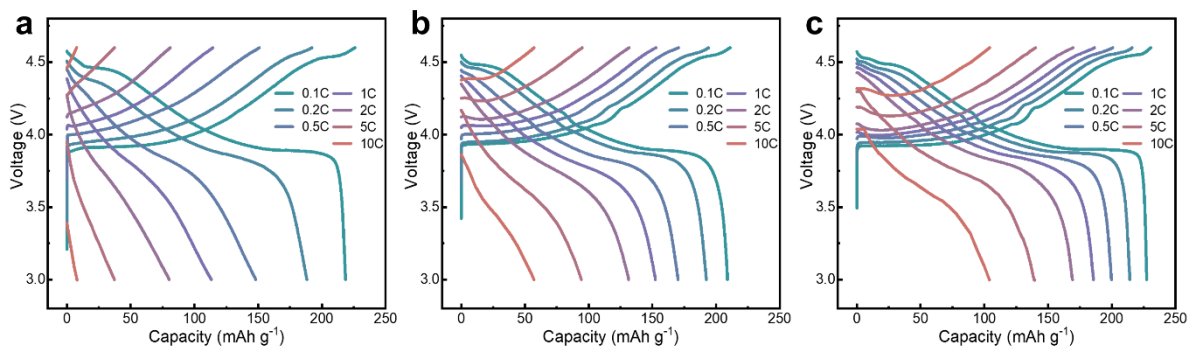

**Fig. S10** Continuous charge/discharge curves under an upper cut-off voltage of 4.6 V (vs. Li/Li<sup>+</sup>) from 0.1C to 10C of **a** LCO, **b** LCO@A and **c** LCO@Z.

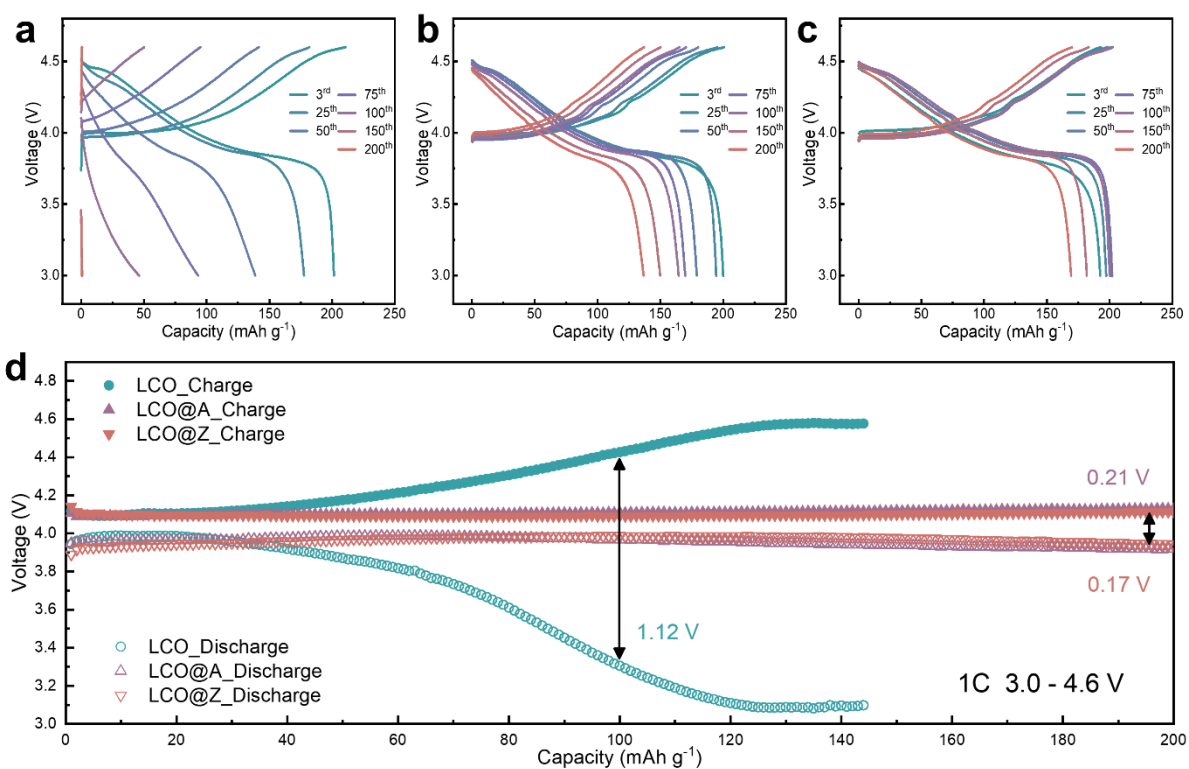

**Fig. S11** Continuous charge/discharge curves from 3<sup>rd</sup> to 200<sup>th</sup> cycles of **a** LCO, **b** LCO@A and **c** LCO@Z at 1C under an upper voltage of 4.6 V (vs. Li/Li<sup>+</sup>). **d** Cycling performance of mid-point voltage of LCO, LCO@A, and LCO@Z at 1C under an upper voltage of 4.6 V (vs. Li/Li<sup>+</sup>).

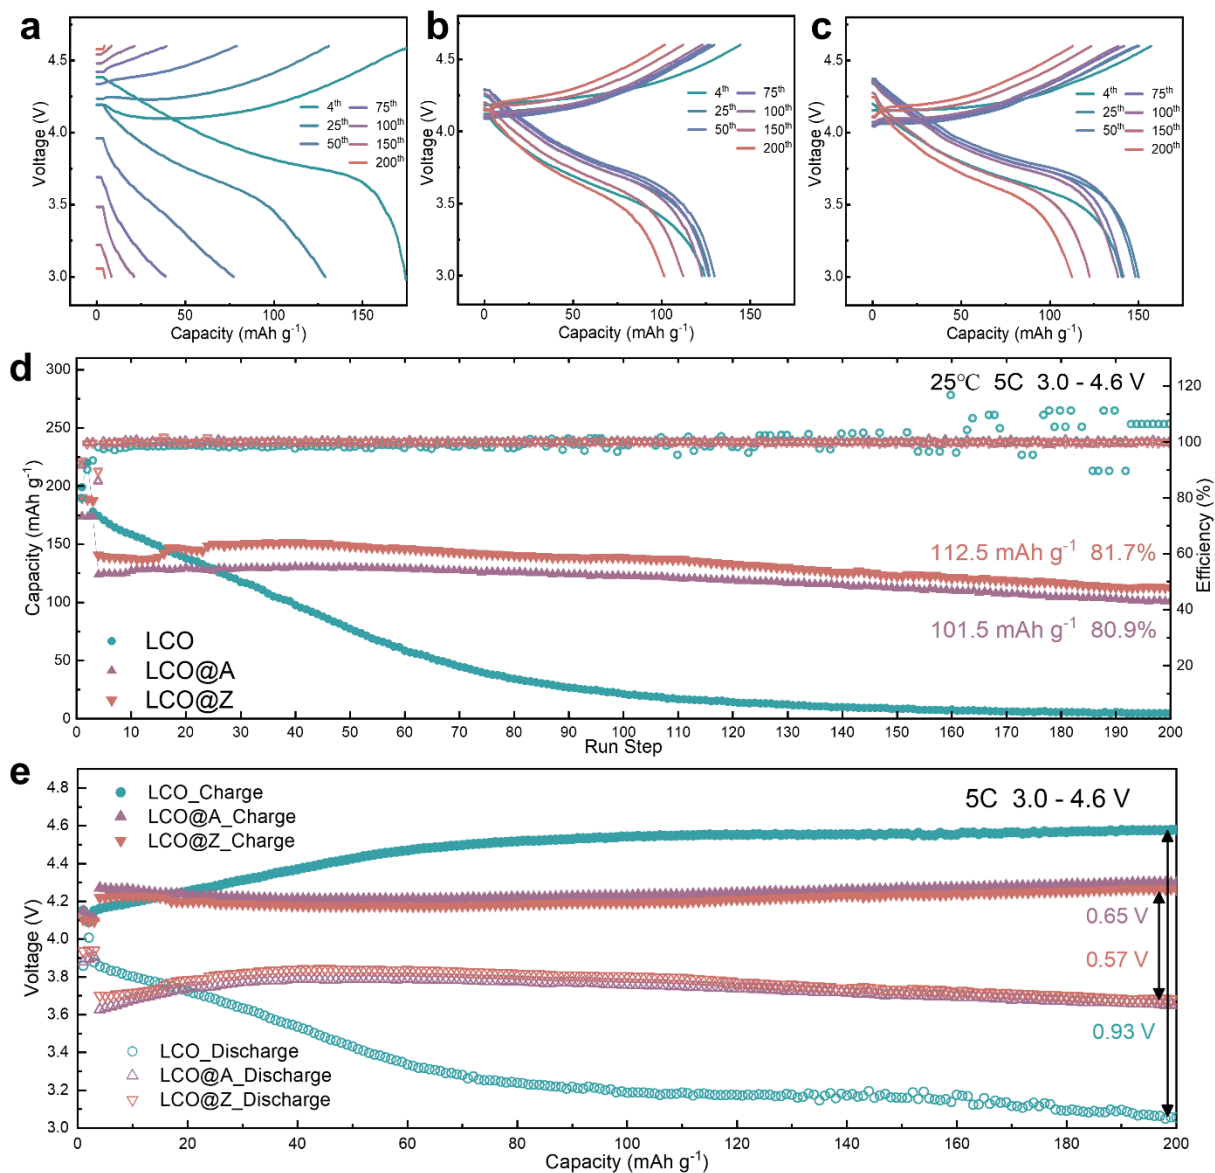

**Fig. S12** High rate (5C) electrochemical performance. Continuous charge/discharge curves from the 4<sup>th</sup> to the 200<sup>th</sup> cycles of **a** LCO, **b** LCO@A and **c** LCO@Z at 5C under an upper cut-off voltage of 4.6 V (vs. Li/Li<sup>+</sup>). **d** Cycling stability of half-cell at 5C under an upper cut-off voltage of 4.6 V (vs. Li/Li<sup>+</sup>) from 1<sup>st</sup> to 200<sup>th</sup> cycles. **e** Cycling performance of mid-point voltages of LCO, LCO@A, and LCO@Z at 5C under an upper cut-off voltage of 4.6 V (vs. Li/Li<sup>+</sup>).

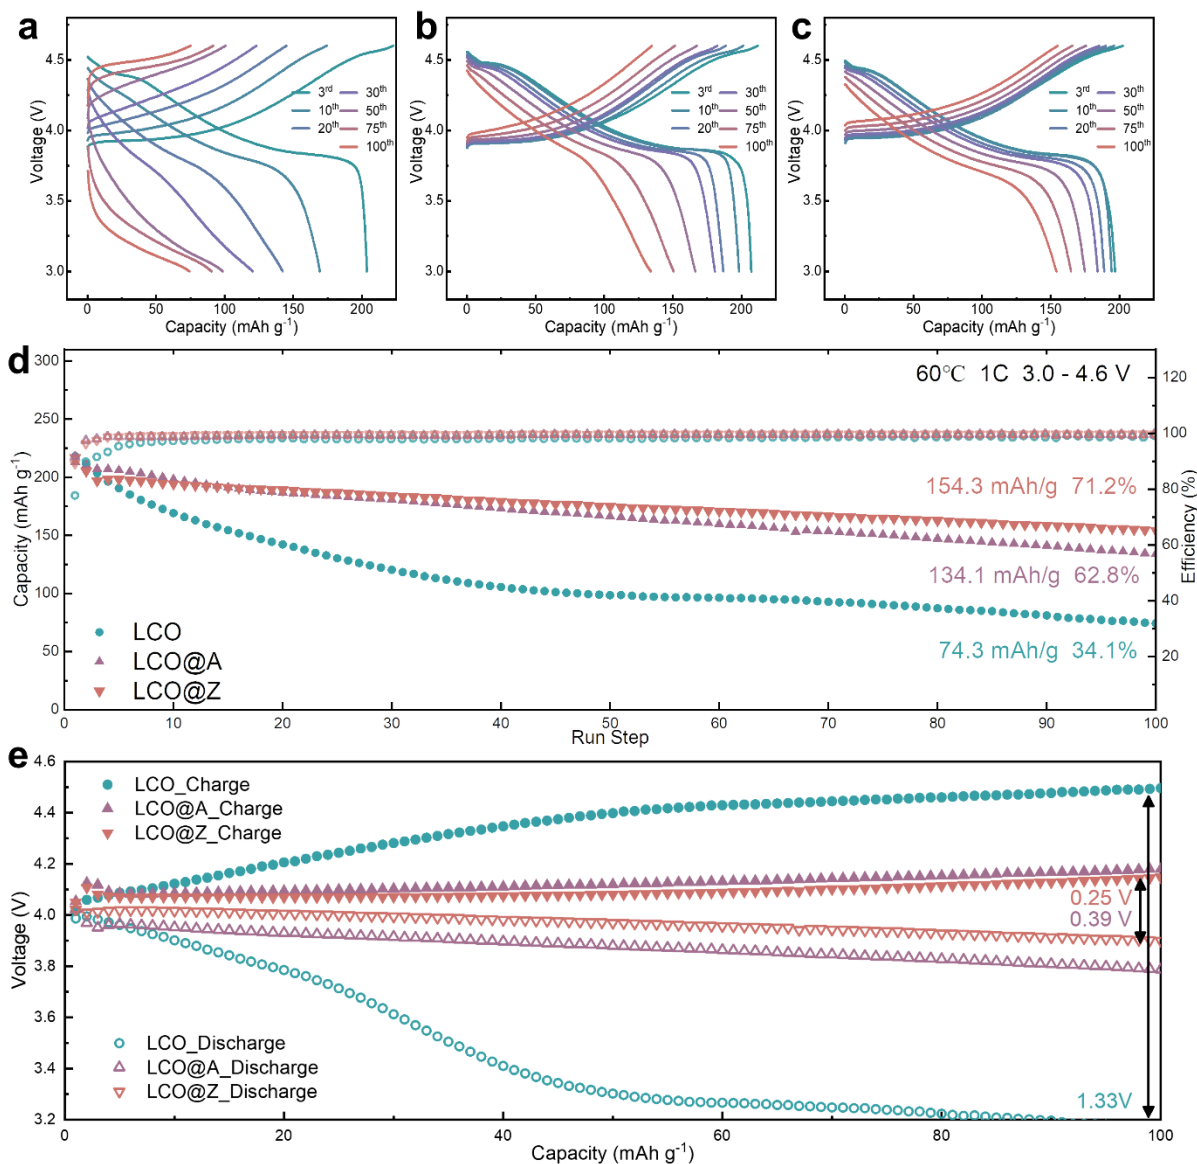

**Fig. S13** High temperature (60°C) electrochemical performance. Continuous charge/discharge curves from the 3<sup>rd</sup> to the 100<sup>th</sup> cycles of **a** LCO, **b** LCO@A and **c** LCO@Z at 1C under an upper cut-off voltage of 4.6 V (vs. Li/Li<sup>+</sup>). **d** Cycling stability of half-cell at 1C under an upper cut-off voltage of 4.6 V (vs. Li/Li<sup>+</sup>) from 1<sup>st</sup> to 100<sup>th</sup> cycles. **e** Cycling performance of mid-point voltages of LCO, LCO@A, and LCO@Z at 1C under an upper cut-off voltage of 4.6 V (vs. Li/Li<sup>+</sup>).

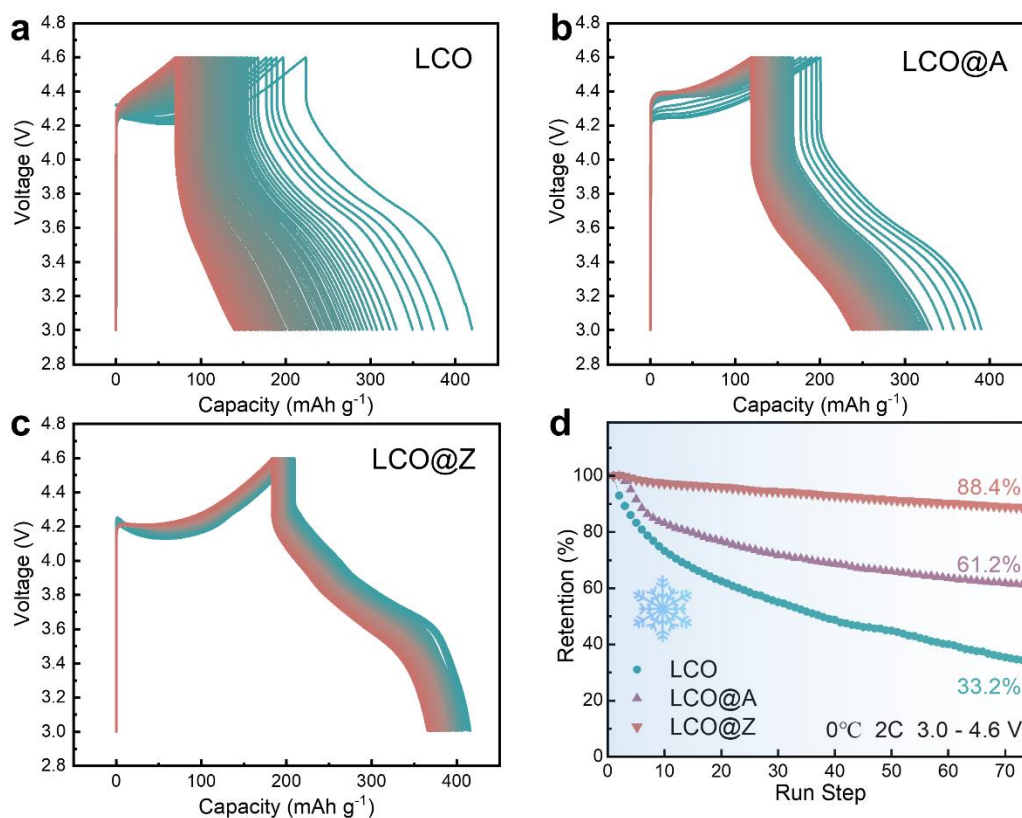

**Fig. S14** Low temperature (0°C) electrochemical performance. Continuous charge/discharge curves from the 1<sup>st</sup> to the 75<sup>th</sup> cycles of **a** LCO, **b** LCO@A and **c** LCO@Z at 2C under an upper cut-off voltage of 4.6 V (vs. Li/Li<sup>+</sup>). **d** Cycling stability of half-cells at 2C under an upper cut-off voltage of 4.6 V (vs. Li/Li<sup>+</sup>) from 1<sup>st</sup> to 75<sup>th</sup> cycles at 0°C.

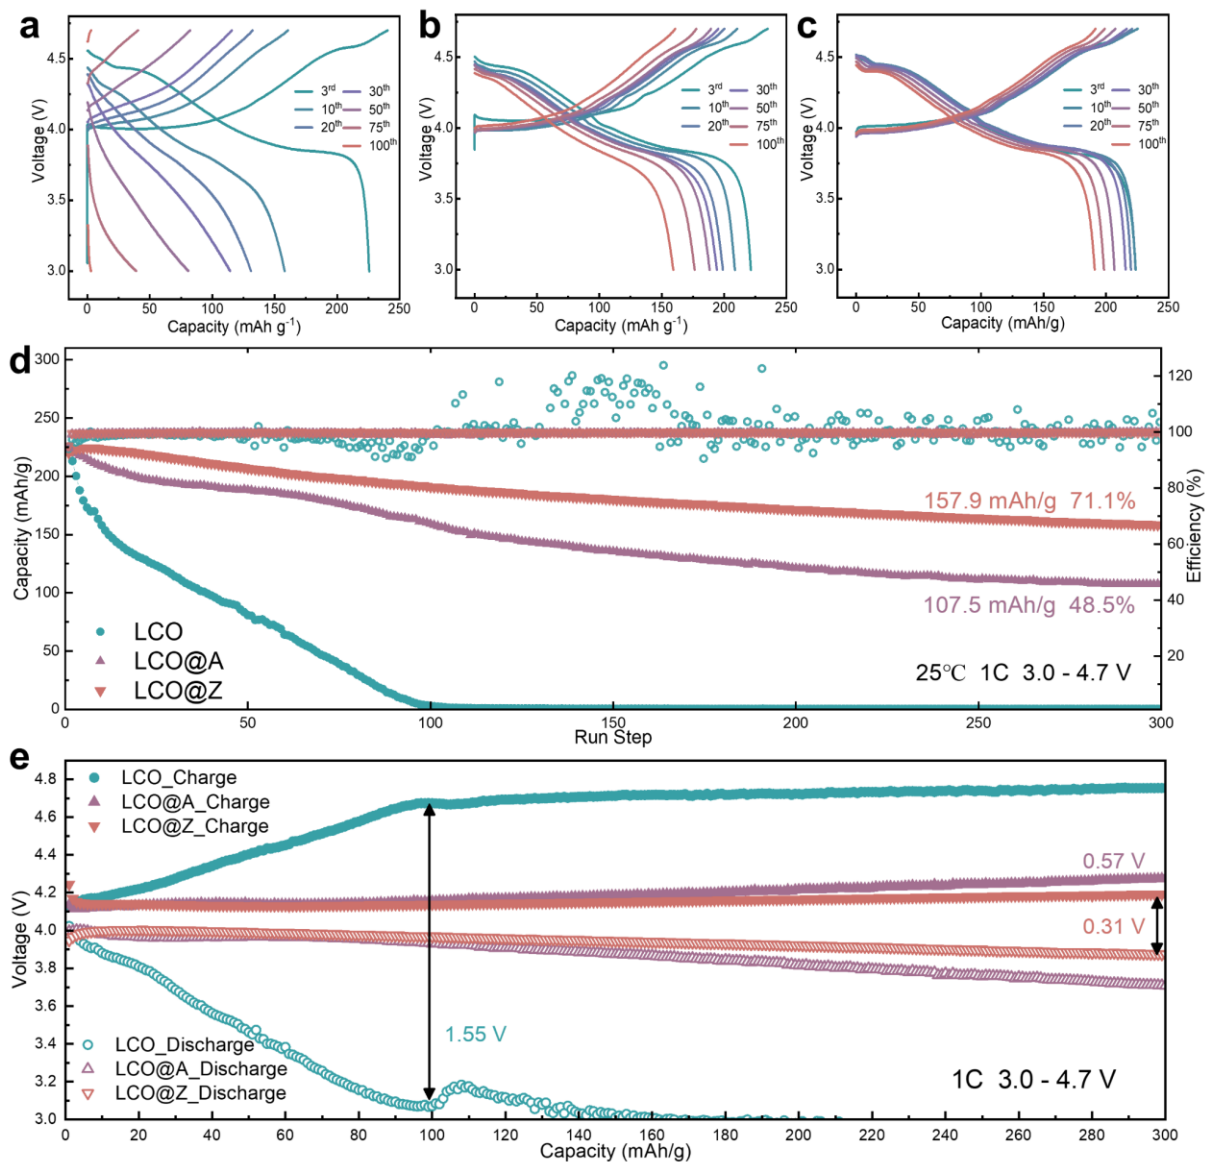

**Fig. S15** High voltage (4.7 V vs. Li/Li<sup>+</sup>) electrochemical performance. Continuous charge/discharge curves from the 3<sup>rd</sup> to the 100<sup>th</sup> cycles of **a** LCO, **b** LCO@A and **c** LCO@Z at 1C under an upper cut-off voltage of 4.7 V. **d** Cycling stability of half-cell at 1C under an upper cut-off voltage of 4.7 V from 1<sup>st</sup> to 300<sup>th</sup> cycles. **e** Cycling performance of mid-point voltages of LCO, LCO@A, and LCO@Z at 1C under an upper cut-off voltage of 4.7 V.



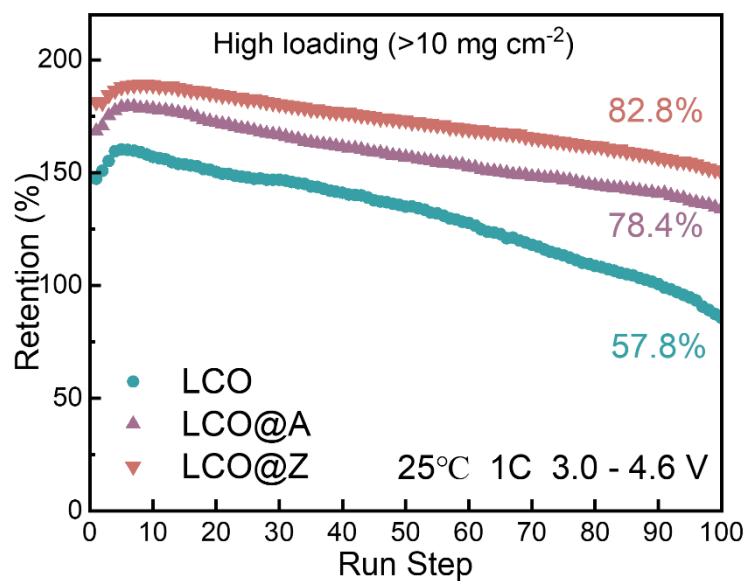

**Fig. S16** Cycling performance of high mass loading (> 10 mg cm<sup>-2</sup>) cathode of LCO, LCO@A and LCO@Z at 1C under an upper cut-off voltage of 4.6 V (vs. Li/Li<sup>+</sup>).

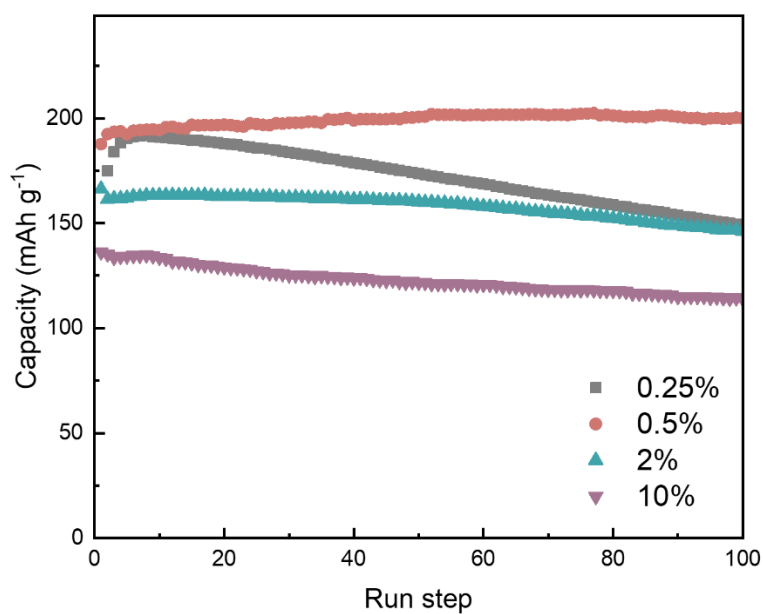

**Fig. S17** Cycling stability of LCO@Z samples (with the concentration of AlPO<sub>4-5</sub> precursor increasing from 0.25% to 10%) at 1C under an upper cut-off voltage of 4.6 V from 1<sup>st</sup> to 100<sup>th</sup> cycles.

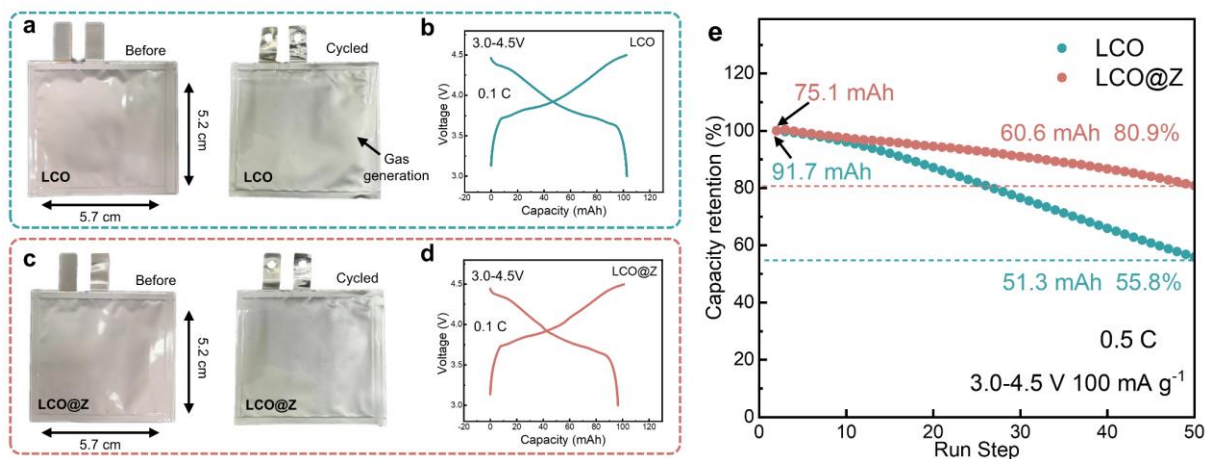

**Fig. S18** LCO||graphite pouch cell. Photo of the assembled pouch cell of **a** LCO and **c** LCO@Z before and after cycling. The first cycle of **b** LCO and **d** LCO@Z at 0.1 C. **e** Cycling stability of pouch cells of LCO and LCO@Z at 3.0-4.5 V (vs. graphite).

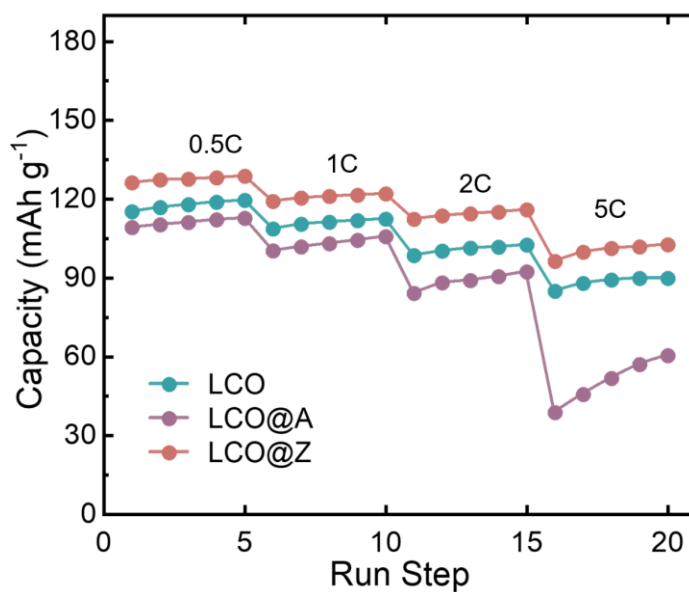

**Fig. S19** Rate capability of LCO, LCO@A and LCO@Z at 3.0-4.2 V from 0.5C to 10C.

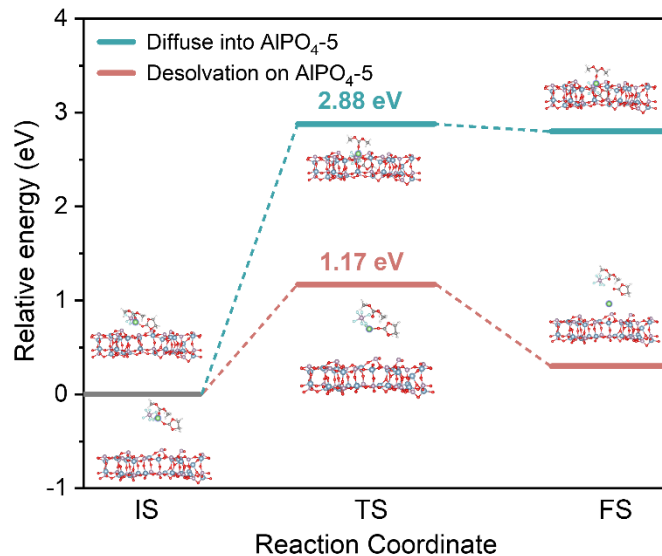

**Fig. S20** DFT-calculated energy barriers (in eV) for the diffusion of Li-EC-DMC-PF<sub>6</sub> complex into the 10.2 Å-pore of AlPO<sub>4</sub>-5 and Li<sup>+</sup>-desolvation on AlPO<sub>4</sub>-5.

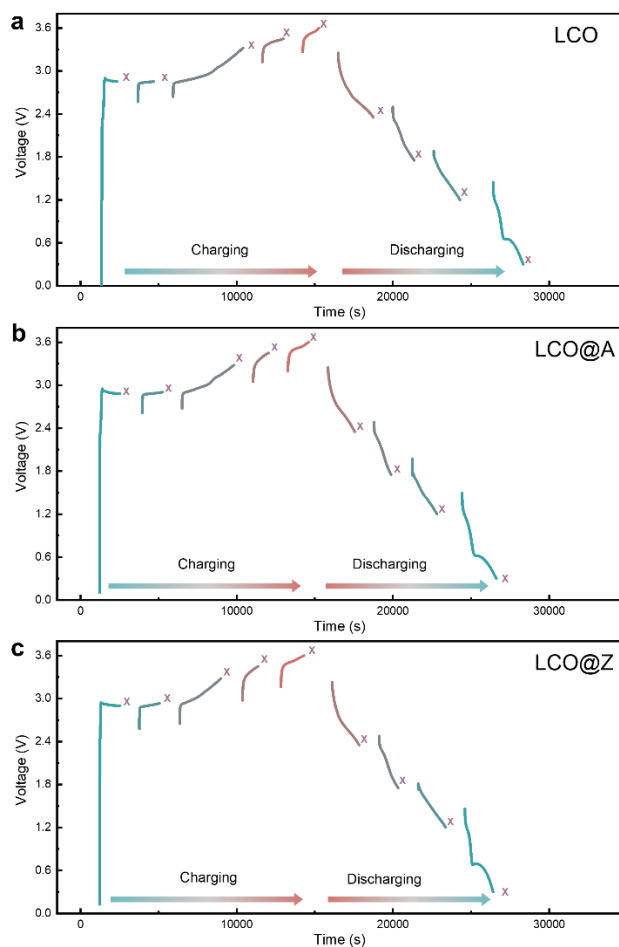

**Fig. S21** The charging and discharging curves of **a** LCO, **b** LCO@A, and **c** LCO@Z electrodes in the second cycle during *in-situ* EIS measurements.

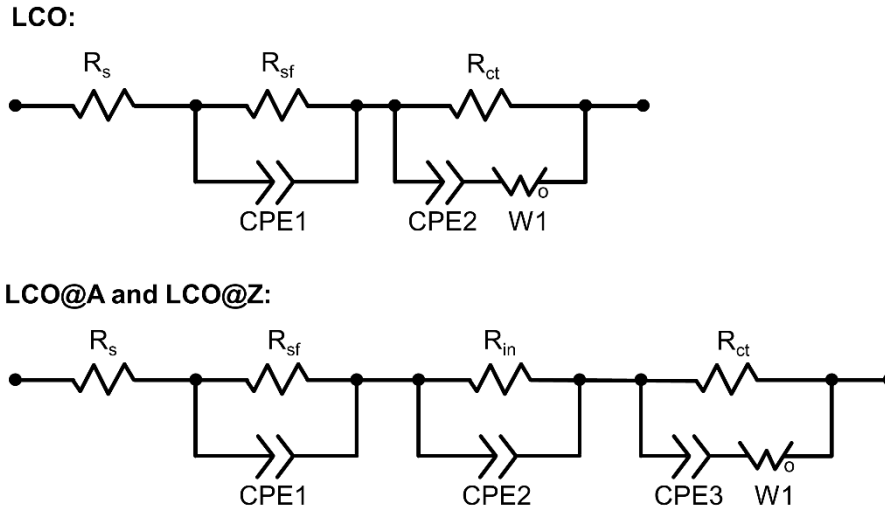

**Fig. S22** An equivalent electrical circuit that describes the impedance behavior of LCO, LCO@A, and LCO@Z electrodes.

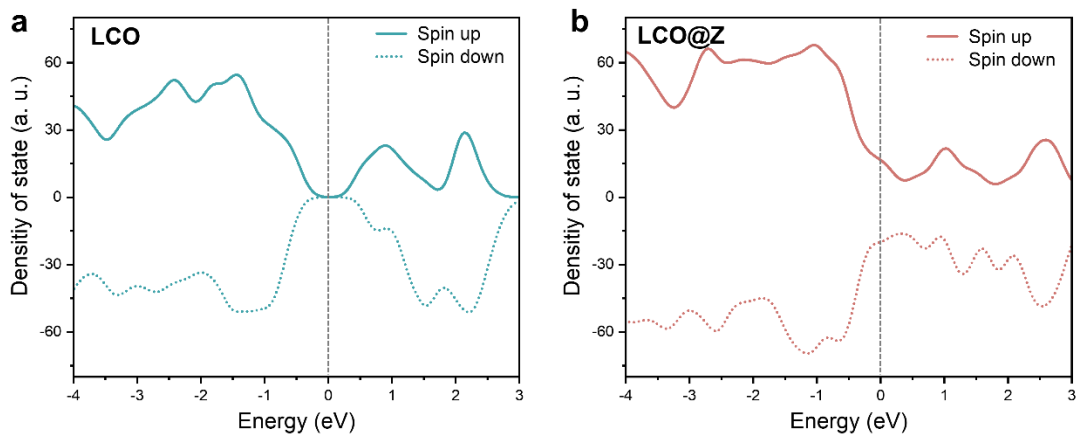

**Fig. S23** The calculated density of states (DOS) for LCO and LCO@Z. The Fermi level was set as zero. DOS contributed from spin-up and spin-down channels are distinguished by curves above and below the central axis.

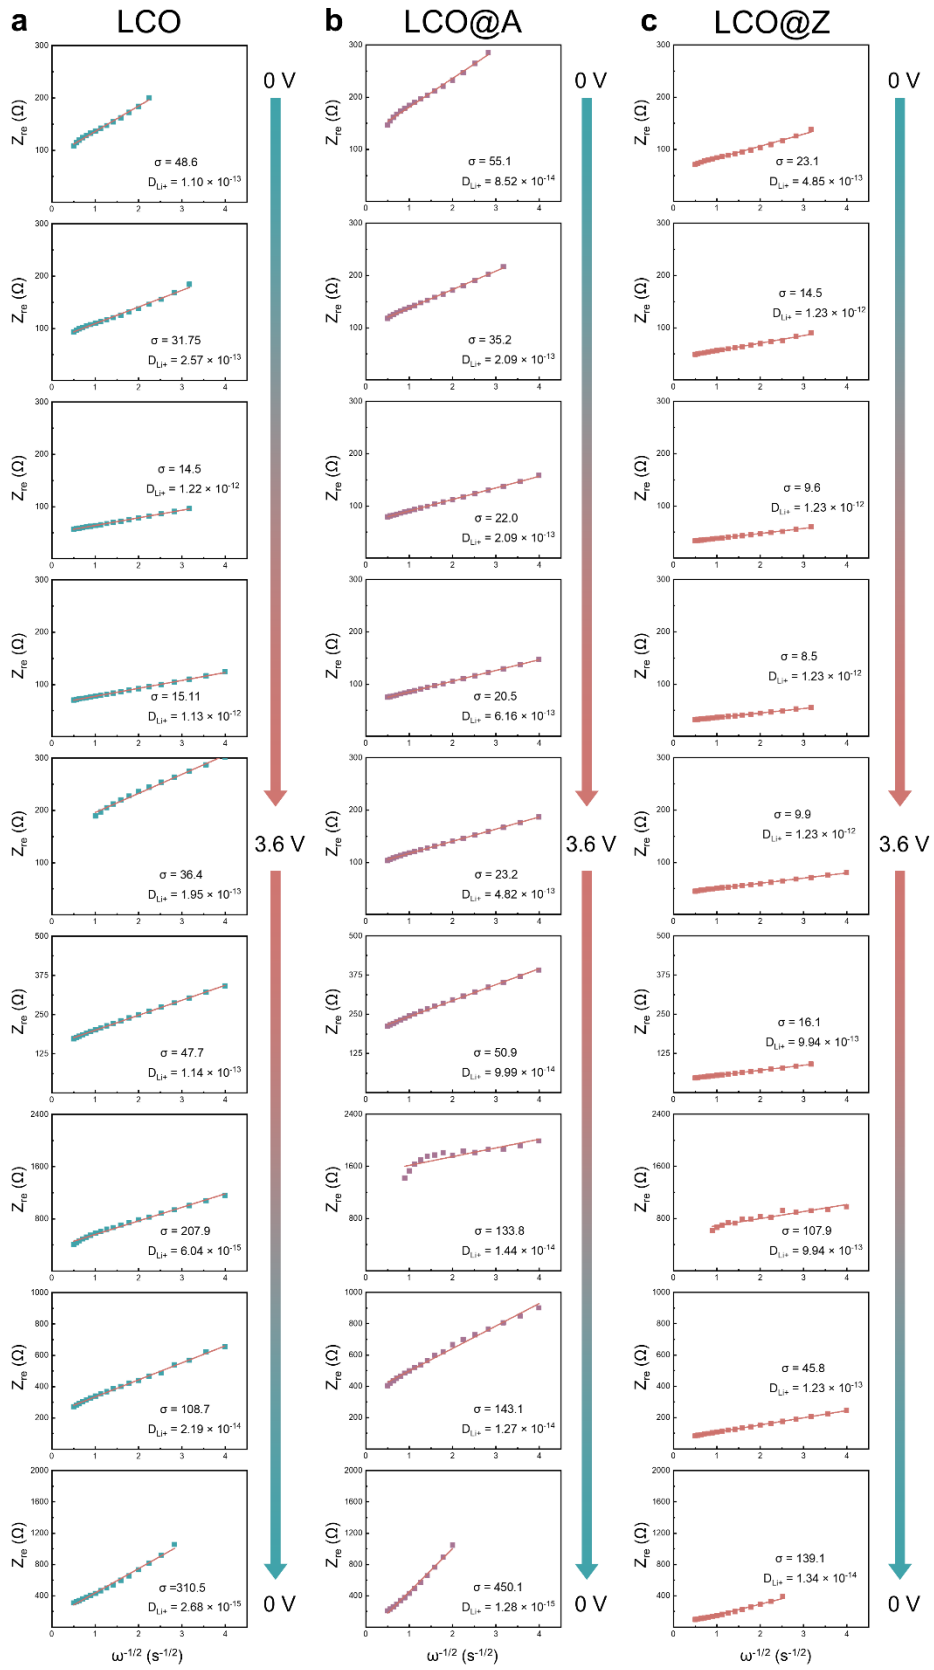

**Fig. S24** Plots of the real parts of the complex impedance versus  $\omega^{-1/2}$  for **a** LCO, **b** LCO@A, and **c** LCO@Z.

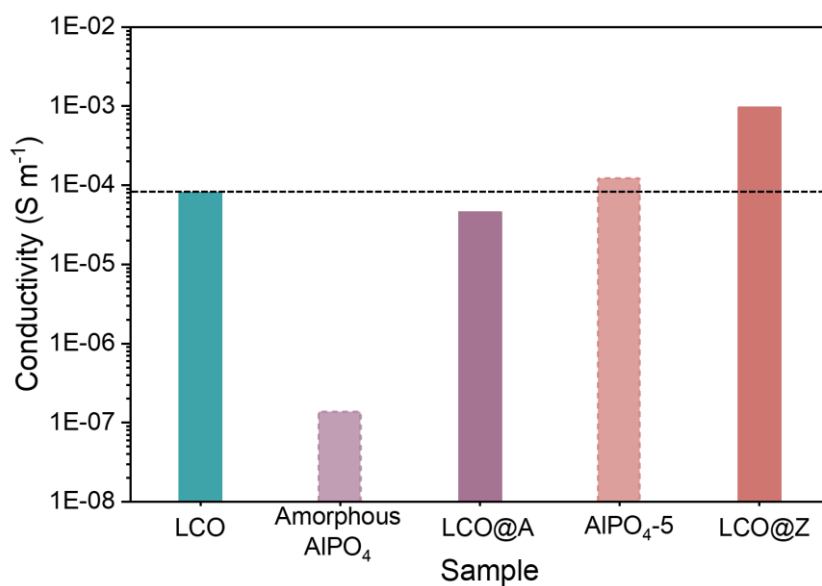

**Fig. S25** Electronic conductivities of LCO, amorphous AlPO<sub>4</sub>, LCO@A, AlPO<sub>4</sub>-5 and LCO@Z under 10 MPa pressure.

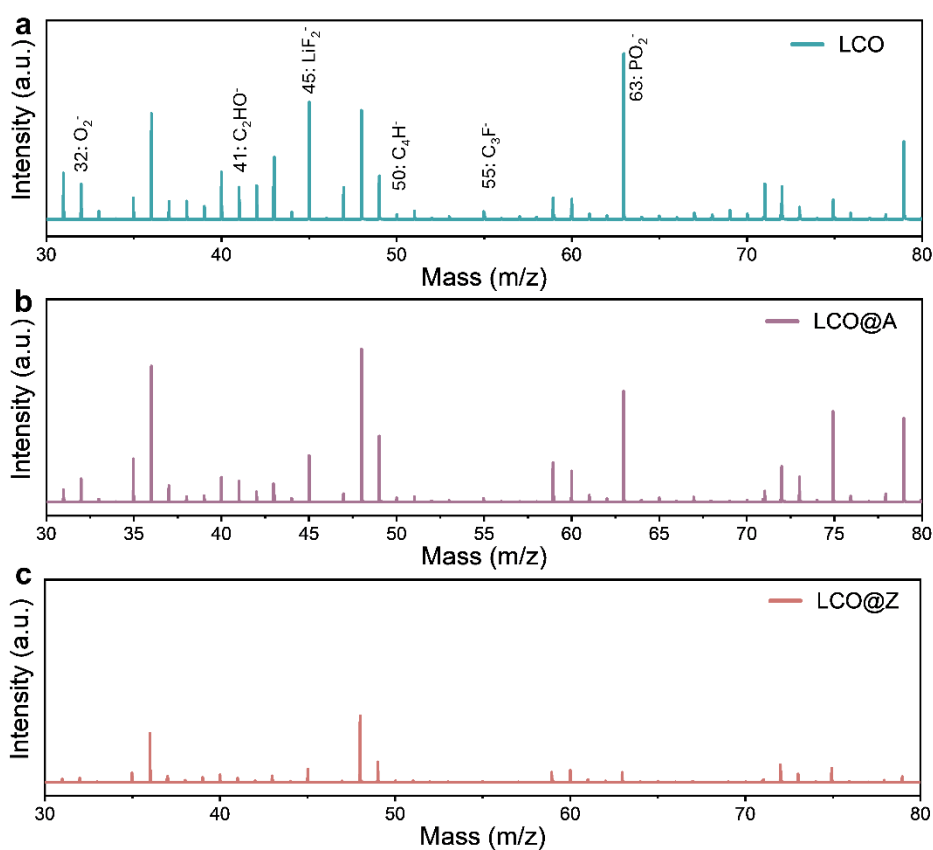

**Fig. S26** TOF-SIMS patterns for negative secondary ion mode.

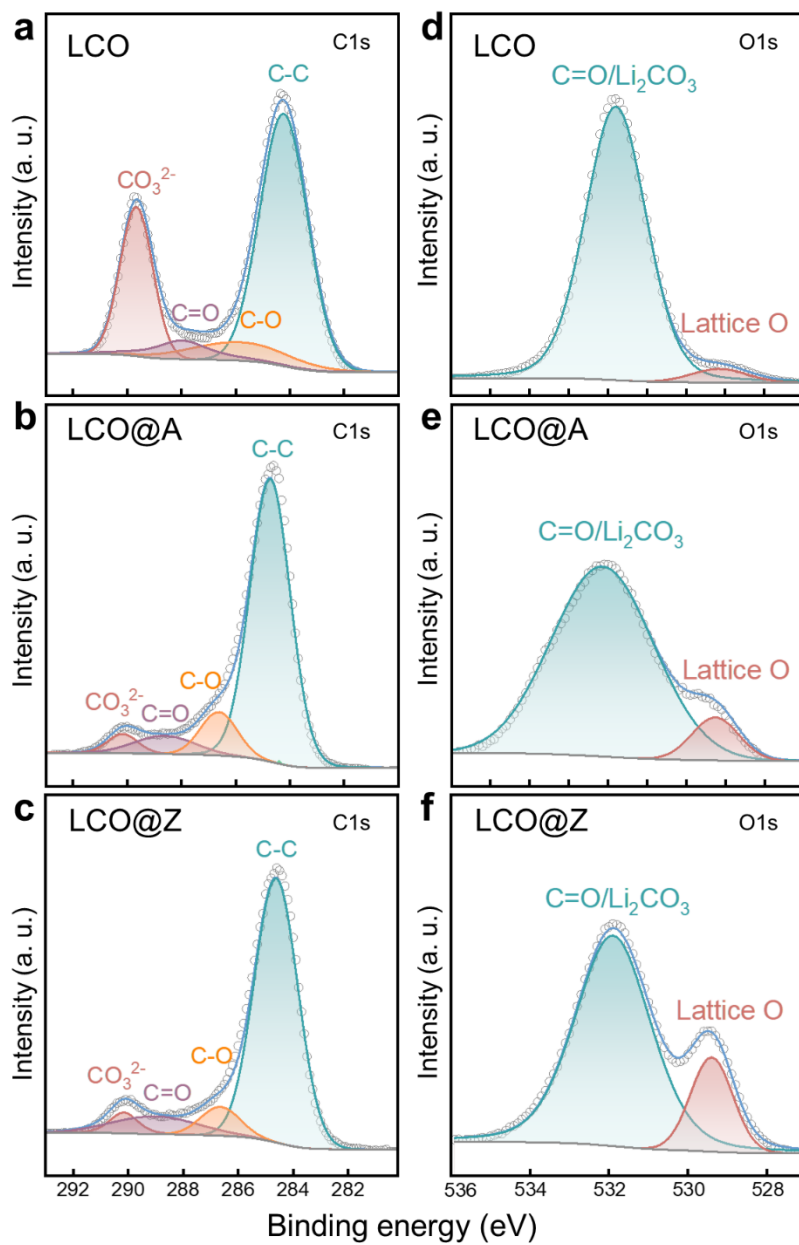

**Fig. S27** The **a-c** C1s and **d-f** O1s XPS spectra of LCO, LCO@A and LCO@Z cathode after 200 cycles.

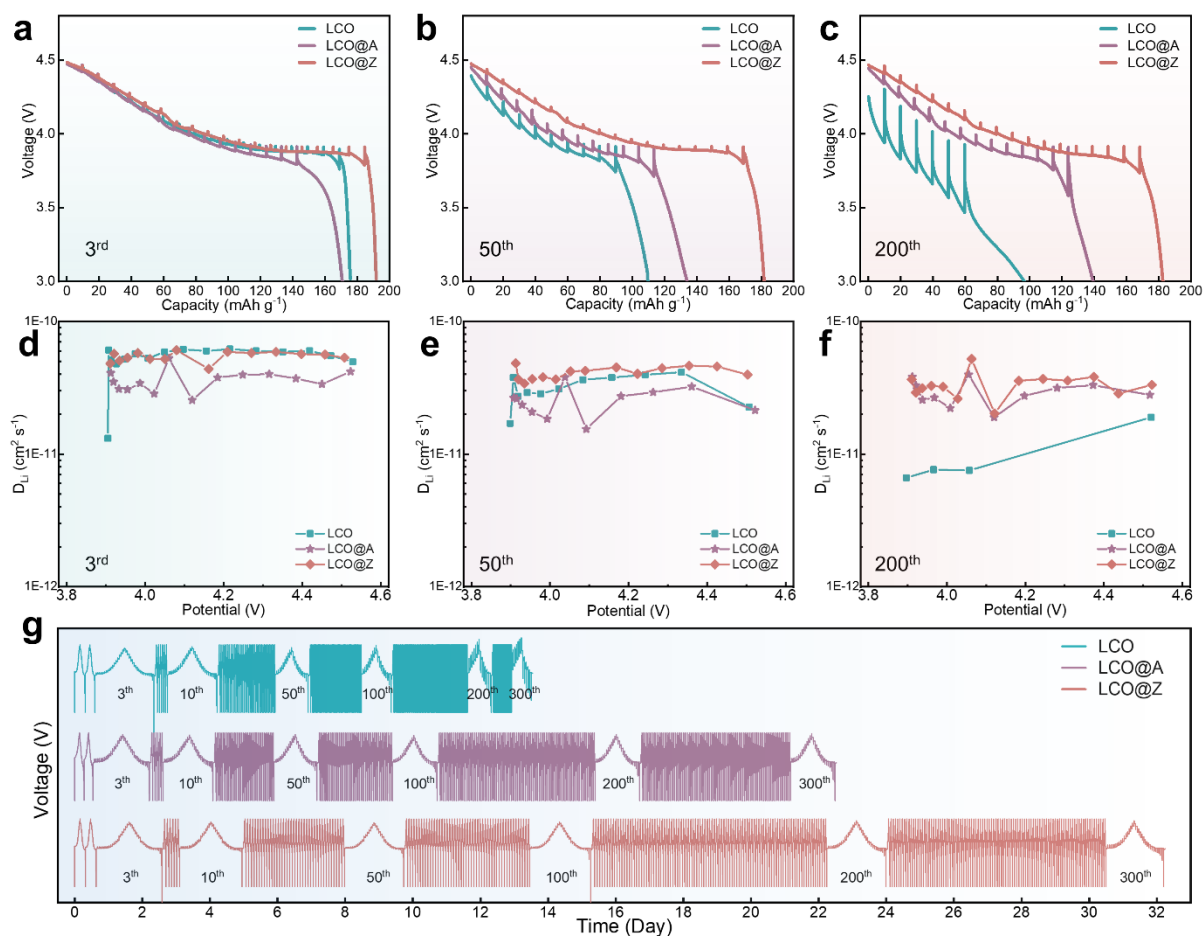

**Fig. S28** GITT curves of **a** LCO, **b** LCO@A and **c** LCO@Z at the 3<sup>rd</sup>, 50<sup>th</sup>, and 200<sup>th</sup> cycle.

The corresponding Li<sup>+</sup> ion diffusion coefficients of **d** LCO, **e** LCO@A and **f** LCO@Z at the 3<sup>rd</sup>, 50<sup>th</sup>, and 200<sup>th</sup> cycle. **g** Cycling performance and overpotential properties of LCO, LCO@A and LCO@Z. GITT measurements are conducted at 0.3 C in the initial two cycles and 1C in the following cycles.

As depicted in **Fig. S28a-c**, LCO@A and LCO@Z demonstrate the smallest electrode polarization from the 3<sup>rd</sup> to the 200<sup>th</sup> cycle, whereas LCO exhibits a rapid increase in electrode polarization starting from the 50<sup>th</sup> cycle. Furthermore, as shown in **Fig. S28g**, LCO@Z requires 32 days to complete 300 cycles, which is longer than LCO (13 days) and LCO@A (22 days). The extended cycling time signifies that LCO@Z exhibits superior cycling stability.

The typical potential versus time profiles of LCO, LCO@A, and LCO@Z are illustrated in



**Fig. S29**, providing further insight into their electrochemical behavior. The evolution of  $\text{Li}^+$  diffusion coefficient ( $D_{\text{Li}^+}$ ) of cathodes during cycling is depicted in **Fig. S28d-f**. During the 3<sup>rd</sup> cycle, the calculated  $D_{\text{Li}^+}$  values are similar for all the three cathodes. However, as cycling progresses from the 50<sup>th</sup> to the 200<sup>th</sup> cycle, the average  $D_{\text{Li}^+}$  of LCO@Z remains almost unchanged, while that of LCO experiences a significant decrease. The GITT results confirm that the effective zeolite coating strategy enhances the  $\text{Li}^+$  diffusion kinetics of LCO@Z, leading to larger and more stable  $\text{Li}^+$  diffusion coefficients compared to LCO and LCO@A. A linear relationship between potential and  $\tau^{1/2}$  can be observed, and  $D_{\text{Li}^+}$  can be calculated based on the equation (1)

$$D = \frac{4}{\pi\tau} \left( \frac{mV_M}{MA} \right)^2 \left( \frac{\Delta E_S}{\Delta E_\tau} \right)^2 \quad (1)$$

where  $m$  and  $M$  indicate the mass and molar mass of the electrode material, respectively.  $V_M$  ( $\text{cm}^3 \text{mol}^{-1}$ ) refers to their molar volume, and  $A$  ( $\text{cm}^2$ ) stands for their active area.

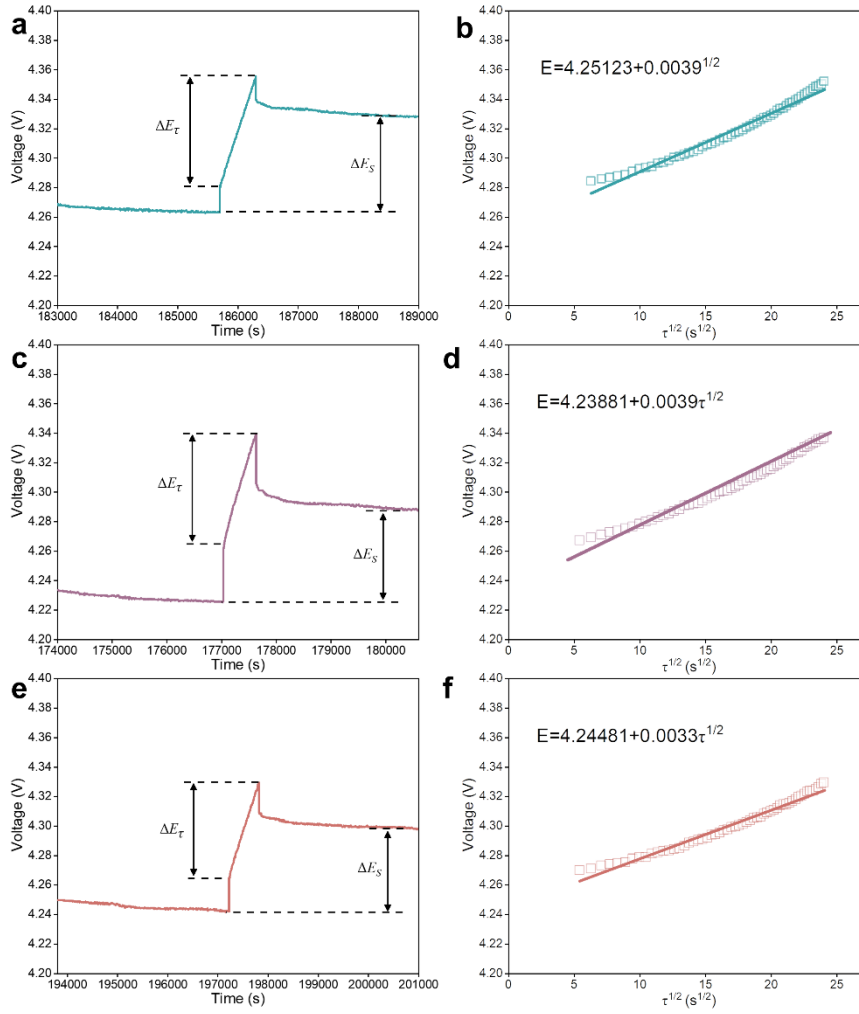

**Fig. S29** A typical voltage versus time profile of **a** LCO, **c** LCO@A and **e** LCO@Z. A linear relationship between voltage and  $\tau^{1/2}$  of **b** LCO, **d** LCO@A and **f** LCO@Z.

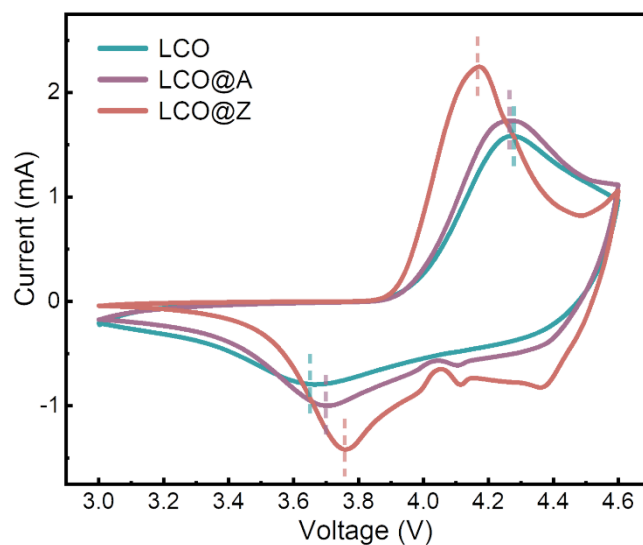

**Fig. S30** Cyclic voltammetry of bare LCO, LCO@A and LCO@Z after 200 cycles.

The redox behaviors of the cathodes are investigated through cyclic voltammetry (CV), as shown in **Fig. S30**. After 200 cycles, the redox peaks of LCO@Z remain sharp, indicating higher reversibility of the redox reactions in the LCO@Z cathode. This observation suggests a significant improvement in cycling stability following surface engineering. On the other hand, the redox peaks of LCO decrease, confirming the occurrence of irreversible structural evolutions after high-voltage long-term cycling.

**Table S1** Quantitative analysis of the Al, P in LCO@Z-0.5% powder by ICP-OES.

| Sample     |    | Elemental content (g kg <sup>-1</sup> ) | Molar ratio of Al/Co or P/Co |
|------------|----|-----------------------------------------|------------------------------|
| LCO@Z-0.5% | Co | 619.11                                  | /                            |
|            | Li | 95.11                                   | /                            |
|            | Al | 1.14                                    | 0.41%                        |
|            | P  | 1.21                                    | 0.37%                        |

**Table S2** Performance comparison of capacity retention of various surface-modified commercial LCO cathodes under high voltage.

| Modification strategy                                          | Rate       | Retention (%)                                    | Journal                                                      |
|----------------------------------------------------------------|------------|--------------------------------------------------|--------------------------------------------------------------|
| AlPO <sub>4</sub> -5 zeolite coated LiCoO <sub>2</sub> (LCO@Z) | 1C         | 94.6% after 100 cycles<br>90.3% after 200 cycles | This work                                                    |
| [1] LCO@Carbonate                                              | 1C         | 90.9% after 100 cycles                           | Advanced Materials (2024) <sup>7</sup>                       |
| [2] LCO@RbAlF <sub>4</sub>                                     | 0.3C       | 90.2% after 100 cycles                           | Advanced Science (2022) <sup>8</sup>                         |
| [3] LCO@MXenes                                                 | 0.5C       | 86.2% after 100 cycles                           | Advanced Functional Materials (2023) <sup>9</sup>            |
| [4] LCO@Lu                                                     | 0.5C       | 86.2% after 150 cycles                           | Advanced Functional Materials (2022) <sup>10</sup>           |
| [5] LCO@LiCoPO <sub>4</sub>                                    | 1C (30°C)  | 92.0% after 200 cycles                           | Advanced Energy Materials (2022) <sup>11</sup>               |
| [6] LCO@Li <sub>3</sub> NbO <sub>4</sub>                       | 0.2C       | 90.9% after 200cycles                            | Advanced Materials (2023) <sup>12</sup>                      |
| [7] LCO@LiFe <sub>0.4</sub> Mn <sub>0.6</sub> PO <sub>4</sub>  | 1C         | 85.4% after 200 cycles                           | Advanced Functional Materials (2023) <sup>13</sup>           |
| [8] LCO@Al-F                                                   | 0.5C       | 86.9% after 200cycles                            | Advanced Energy Materials (2022) <sup>14</sup>               |
| [9] LCO@Li-Al-F                                                | 0.5C       | 82.6% after 200 cycles                           | Advanced Functional Materials (2022) <sup>15</sup>           |
| [10] LCO@Li/Al/F                                               | 0.1C       | 81.8% after 200 cycles                           | Nature Communications (2018) <sup>16</sup>                   |
| [11] LCO@Li <sub>2</sub> CoTi <sub>3</sub> O <sub>8</sub>      | 0.1C       | 81.2% after 200 cycles                           | Advanced Science (2022) <sup>17</sup>                        |
| [12] LCO@Rock-Salt                                             | 1C (4.65V) | 85.9% after 300 cycles                           | Advanced Energy Materials (2024) <sup>18</sup>               |
| [13] LCO@Nanofilm                                              | 1C (4.7V)  | 85.7% after 300 cycles                           | Angewandte Chemie International Edition (2024) <sup>19</sup> |
| [14] LCO@polyanionic                                           | 1C         | 84% after 300 cycles                             | Energy & Environmental Science (2024) <sup>20</sup>          |

**Table S3** The simulated results from EIS spectra of LCO, LCO@A, and LCO@Z at various state of charges (SOCs) during the second charge/discharge cycle.

| Samples | SOC                  | Simulated electrochemical parameters |                  |                  |                                                    |                                             |
|---------|----------------------|--------------------------------------|------------------|------------------|----------------------------------------------------|---------------------------------------------|
|         |                      | $R_{sf}(\Omega)$                     | $R_{in}(\Omega)$ | $R_{ct}(\Omega)$ | $\sigma(\Omega \cdot \text{cm}^2 \text{mol}^{-1})$ | $D_{Li^+}(\text{cm}^2 \cdot \text{s}^{-1})$ |
| LCO     | Charged to 4.0 V     | 17.1                                 | /                | 81.7             | 48.6                                               | $1.10 \times 10^{-13}$                      |
|         | Charged to 4.15 V    | 17.3                                 | /                | 73.8             | 31.7                                               | $2.57 \times 10^{-13}$                      |
|         | Charged to 4.3 V     | 25.9                                 | /                | 26.2             | 14.5                                               | $1.22 \times 10^{-12}$                      |
|         | Charged to 4.45 V    | 29.6                                 | /                | 37.3             | 15.11                                              | $1.13 \times 10^{-12}$                      |
|         | Charged to 4.6 V     | 35.4                                 | /                | 179.9            | 36.4                                               | $1.95 \times 10^{-13}$                      |
|         | Discharged to 4.45 V | 73.1                                 | /                | 101.8            | 47.7                                               | $1.14 \times 10^{-13}$                      |
|         | Discharged to 4.3 V  | 127.9                                | /                | 80.5             | 207.9                                              | $6.04 \times 10^{-15}$                      |
|         | Discharged to 4.15 V | 132.5                                | /                | 88.9             | 108.7                                              | $2.19 \times 10^{-14}$                      |
|         | Discharged to 4.0 V  | 99.89                                | /                | 155.2            | 310.5                                              | $2.68 \times 10^{-15}$                      |
| LCO@A   | Charged to 4.0 V     | 15.2                                 | 27.4             | 134.9            | 55.1                                               | $8.52 \times 10^{-14}$                      |
|         | Charged to 4.15 V    | 19.1                                 | 22.3             | 199.8            | 35.2                                               | $2.09 \times 10^{-13}$                      |
|         | Charged to 4.3 V     | 22.8                                 | 14.4             | 36.3             | 22.0                                               | $5.34 \times 10^{-13}$                      |
|         | Charged to 4.45 V    | 24.3                                 | 13.8             | 36.1             | 20.5                                               | $6.16 \times 10^{-13}$                      |
|         | Charged to 4.6 V     | 28.2                                 | 12.1             | 72.5             | 23.2                                               | $4.82 \times 10^{-13}$                      |
|         | Discharged to 4.45 V | 92.9                                 | 40.2             | 104.9            | 50.9                                               | $9.99 \times 10^{-14}$                      |
|         | Discharged to 4.3 V  | 79.7                                 | 85.5             | 140.3            | 133.8                                              | $1.44 \times 10^{-14}$                      |
|         | Discharged to 4.15 V | 95.3                                 | 97.3             | 180.5            | 143.1                                              | $1.27 \times 10^{-14}$                      |
|         | Discharged to 4.0 V  | 100.2                                | 99.6             | 219.9            | 450.1                                              | $1.28 \times 10^{-15}$                      |
| LCO@Z   | Charged to 4.0 V     | 12.1                                 | 21.9             | 50.2             | 23.1                                               | $4.83 \times 10^{-13}$                      |
|         | Charged to 4.15 V    | 9.3                                  | 15.4             | 29.3             | 14.5                                               | $1.23 \times 10^{-12}$                      |
|         | Charged to 4.3 V     | 7.5                                  | 6.1              | 21.4             | 9.6                                                | $2.81 \times 10^{-12}$                      |
|         | Charged to 4.45 V    | 8.5                                  | 5.3              | 18.9             | 8.5                                                | $3.58 \times 10^{-12}$                      |
|         | Charged to 4.6 V     | 11.3                                 | 9.5              | 24.3             | 9.9                                                | $2.65 \times 10^{-12}$                      |
|         | Discharged to 4.45 V | 11.5                                 | 9.5              | 25.1             | 16.1                                               | $9.94 \times 10^{-13}$                      |
|         | Discharged to 4.3 V  | 7.1                                  | 6.4              | 15.1             | 107.9                                              | $2.22 \times 10^{-14}$                      |
|         | Discharged to 4.15 V | 12.2                                 | 27.9             | 34.3             | 45.8                                               | $1.23 \times 10^{-13}$                      |
|         | Discharged to 4.0 V  | 12.9                                 | 29.2             | 43.8             | 139.1                                              | $1.34 \times 10^{-14}$                      |

**Table S4** Electronic conductivities of LCO, amorphous AlPO<sub>4</sub>, LCO@A, AlPO<sub>4-5</sub> and LCO@Z under 10 MPa pressure.

| Sample                               | LCO                   | Amorphous AlPO <sub>4</sub> | LCO@A                 | AlPO <sub>4-5</sub>   | LCO@Z                 |
|--------------------------------------|-----------------------|-----------------------------|-----------------------|-----------------------|-----------------------|
| Conductivity<br>(S m <sup>-1</sup> ) | $8.07 \times 10^{-5}$ | $1.34 \times 10^{-7}$       | $4.56 \times 10^{-5}$ | $1.21 \times 10^{-4}$ | $9.59 \times 10^{-4}$ |

**Table S5** Quantitative analysis of the Co and Li contents in cycled Li metal anodes paired with LCO, LCO@A and LCO@Z cathodes by ICP-OES.

| Sample                            |    | LCO                | LCO@A              | LCO@Z              |
|-----------------------------------|----|--------------------|--------------------|--------------------|
| Quality<br>(ug kg <sup>-1</sup> ) | Co | 12264              | 5109               | 665                |
|                                   | Li | $2.25 \times 10^7$ | $2.40 \times 10^7$ | $2.18 \times 10^7$ |
| Molar ratio<br>(Co/Li)            |    | 4.736 ‰            | 1.793 ‰            | 0.249 ‰            |

## Reference

1. G. Kresse and J. Furthmüller, *Phys. Rev. B*, 1996, **54**, 11169.
2. G. Kresse and D. Joubert, *Phys. Rev. B*, 1999, **59**, 1758.
3. J. P. Perdew, K. Burke and M. Ernzerhof, *Phys. Rev. Lett.*, 1996, **77**, 3865.
4. S. Grimme, J. Antony, S. Ehrlich and H. Krieg, *J. Chem. Phys.*, 2010, **132**, 154104.
5. A. Jain, S. P. Ong, G. Hautier, W. Chen, W. D. Richards, S. Dacek, S. Cholia, D. Gunter, D. Skinner, G. Ceder and K. A. Persson, *APL Mater.*, 2013, **1**, 011002.
6. G. Henkelman, B. P. Uberuaga and H. Jónsson, *J. Chem. Phys.*, 2000, **113**, 9901-9904.
7. H. Liao, M. Cai, W. Ma, Y. Cao, S. Zhao, Y. Dong and F. Huang, *Adv. Mater.*, 2024, **n/a**, e2402739.
8. T. Fan, Y. Wang, V. K. Harika, A. Nimkar, K. Wang, X. Liu, M. Wang, L. Xu, Y. Elias, H. Sclar, M. S. Chae, Y. Min, Y. Lu, N. Shpigel and D. Aurbach, *Adv. Sci.*, 2022, **9**, e2202627.
9. C. Sun, B. Zhao, J. Mao, K. H. Dai, Z. y. Wang, L. b. Tang, H. z. Chen, X. h. Zhang and J. c. Zheng, *Adv. Funct. Mater.*, 2023, **33**, 2300589.
10. J. Xia, N. Zhang, Y. Yang, X. Chen, X. Wang, F. Pan and J. Yao, *Adv. Funct. Mater.*, 2022, **33**, 2212869.
11. X. R. Yang, C. W. Wang, P. F. Yan, T. P. Jiao, J. L. Hao, Y. Y. Jiang, F. C. Ren, W. G. Zhang, J. M. Zheng, Y. Cheng, X. S. Wang, W. Yang, J. P. Zhu, S. Y. Pan, M. Lin, L. Y. Zeng, Z. L. Gong, J. T. Li and Y. Yang, *Adv. Energy Mater.*, 2022, **12**, 2200197.
12. Y. Yan, Q. Fang, X. Kuai, S. Zhou, J. Chen, H. Zhang, X. Wu, G. Zeng, Z. Wu, B. Zhang, Y. Tang, Q. Zheng, H. G. Liao, K. Dong, I. Manke, X. Wang, Y. Qiao and S. G. Sun, *Adv. Mater.*, 2024, **36**, e2308656.
13. Y. Yan, S. Zhou, Y. Zheng, H. Zhang, J. Chen, G. Zeng, B. Zhang, Y. Tang, Q. Zheng, C. Wang, C. W. Wang, H. G. Liao, I. Manke, X. Kuai, K. Dong, Y. Sun, Y. Qiao and S. G. Sun, *Adv. Funct. Mater.*, 2023, **34**, 2310799.
14. W. Huang, Q. Zhao, M. Zhang, S. Xu, H. Xue, C. Zhu, J. Fang, W. Zhao, G. Ren, R. Qin, Q. Zhao, H. Chen and F. Pan, *Adv. Energy Mater.*, 2022, **12**, 2200813.
15. T. Fan, W. Kai, V. K. Harika, C. Liu, A. Nimkar, N. Leifer, S. Maiti, J. Grinblat, M. N.



- Tsubery, X. Liu, M. Wang, L. Xu, Y. Lu, Y. Min, N. Shpigel and D. Aurbach, *Adv. Funct. Mater.*, 2022, **32**, 2204972.
16. J. Qian, L. Liu, J. Yang, S. Li, X. Wang, H. L. Zhuang and Y. Lu, *Nat. Commun.*, 2018, **9**, 4918.
  17. S. Mao, Z. Shen, W. Zhang, Q. Wu, Z. Wang and Y. Lu, *Adv. Sci.*, 2022, **9**, e2104841.
  18. W. Ding, H. Ren, Z. Li, M. Shang, Y. Song, W. Zhao, L. Chang, T. Pang, S. Xu, H. Yi, L. Zhou, H. Lin, Q. Zhao and F. Pan, *Adv. Energy Mater.*, 2024, **14**, 2303926.
  19. J. Yao, Y. Li, T. Xiong, Y. Fan, L. Zhao, X. Cheng, Y. Tian, L. Li, Y. Li, W. Zhang, P. Yu, P. Guo, Z. Yang, J. Peng, L. Xue, J. Wang, Z. Li, M. Xie, H. Liu and S. Dou, *Angew. Chem., Int. Ed.*, 2024, **63**, e202407898.
  20. W. Zheng, G. Liang, H. Guo, J. Li, J. Zou, J. A. Yuwono, H. Shu, S. Zhang, V. K. Peterson, B. Johannessen, L. Thomsen, W. Hu and Z. Guo, *Energy Environ. Sci.*, 2024, **17**, 4147-4156.
